# Supplementary material for: Age-, sex- and ethnicity-related differences in body weight, blood pressure, HbA1c and lipid levels at the diagnosis of type 2 diabetes relative to people without diabetes
Source: Springer Nature journal article supplement (doi:10.1007/s00125-020-05169-6), 2020-05-21

## Electronic Supplementary Material (ESM)

### Content

|                                                                                                                                                                                                                                | <b>Page</b> |
|--------------------------------------------------------------------------------------------------------------------------------------------------------------------------------------------------------------------------------|-------------|
| <b>ESM Methods</b>                                                                                                                                                                                                             | 2           |
| Identifying and classifying ethnicity from primary care and hospital data                                                                                                                                                      | 2           |
| <b>Missing data</b>                                                                                                                                                                                                            | 3           |
| Key differences in missingness                                                                                                                                                                                                 | 3           |
| Imputation model                                                                                                                                                                                                               | 3           |
| <b>ESM Table 1.</b> Proportion of people with type 2 diabetes and controls with missing data on risk factors by sex and ethnicity                                                                                              | 4           |
| <b>ESM Table 2.</b> Differences in clinical characteristics between those with and without missing data on biological risk factors                                                                                             | 5-6         |
| <b>ESM Table 3.</b> Differences in clinical characteristics between those with and without missing data on biological risk factors, by sex                                                                                     | 7-8         |
| <b>ESM Table 4.</b> Differences in clinical characteristics between those with and without missing data on biological risk factors, by ethnicity                                                                               | 9-12        |
| <b>ESM Table 5.</b> Baseline characteristics of controls without diabetes                                                                                                                                                      | 13-14       |
| <b>ESM Table 6.</b> Adjusted age-specific mean (95% CI) differences in biological risk factor levels in people with newly diagnosed type 2 diabetes compared to matched people without diabetes                                | 15          |
| <b>ESM Table 7.</b> Adjusted age-specific mean (95% CI) differences in biological risk factor levels in men and women newly diagnosed with type 2 diabetes compared with people without diabetes                               | 16-17       |
| <b>ESM Table 8.</b> Adjusted age-specific mean (95% CI) differences in biological risk factor levels in Whites, South Asians and Blacks newly diagnosed with type 2 diabetes compared with people without diabetes             | 18-19       |
| <b>ESM Table 9.</b> Adjusted mean (95%CI) differences in biological risk factor levels at age of diabetes onset between those newly diagnosed with type 2 diabetes compared with people without diabetes, by ethnicity and sex | 20-21       |
| <b>ESM Fig 1.</b> Combining ethnicity records from CPRD and hospital records (HES)                                                                                                                                             | 22          |

## ESM Methods.

### Identifying and classifying ethnicity from primary care and hospital data

Ethnicity records were identified from two sources to increase completeness of available ethnicity information and improve accuracy of the categorisation; (i.) primary care data (CPRD) using Read codes recorded by the general practice and (ii.) hospital data (linked to patients identified in CPRD), recorded by a healthcare professional.

In both general practice and in hospital, patients can have their ethnicity recorded repeatedly over multiple consultations or visits. Discrepancies may arise if there are mistakes while entering the data or if the patient chooses a different ethnic group when asked by the service provider [1]. The linked hospital data provided by CPRD (HES), contains one ethnicity grouping record for each patient; this variable is derived by CPRD and is the most frequently recorded ethnicity value across episodes and hospitalisations in Admitted Patient Care (APC), Outpatient and A&E data [2]. This process has not been carried out in the primary care data, with multiple records and discrepancies potentially occurring.

All ethnicity codes within CPRD and HES were collapsed into the five higher-levels groups developed by the ONS; White, Mixed, Asian/Asian British, Black/Black British, Other [3]. The data from the two sources was then combined, as shown in ESM Figure 1. If patients had no ethnic codes in CPRD, the HES ethnic group was assigned to the patient, if available. In patients with multiple ethnic codes recorded in CPRD, the ethnicity recorded in HES was used to clarify classification.

There were three types of multiple codings within CPRD and between CPRD and HES [1];

1. truly matched  
multiple ethnic codes which are identical
2. categorically matched  
multiple ethnic codes which are different but fall within the same five higher-level groups of ethnicity
3. truly mismatched  
multiple ethnicities which span different higher level groups.

After combining the data sources and generating a final ethnic classification defined into one of the five higher-level groups, the Asian/British Asian group was delineated into South Asians (Indian, Pakistani, Bangladeshi), with the remaining Asian/British Asian types (Chinese, other Asian) being reclassified as “other” (which includes East/Southeast Asian ethnicities; for example, Korean, Japanese, Vietnamese, etc.)

### References

1. Mathur R, Bhaskaran K, Chaturvedi N, et al (2014) Completeness and usability of ethnicity data in UK-based primary care and hospital databases. *J Public Health (Bangkok)* 36(4):684–692
2. Medicines and Healthcare Products Regulatory Agency, CPRD (2019) Hospital Episode Statistics (HES) Admitted Patient Care and CPRD primary care data Documentation (Set 17). [https://cprd.com/sites/default/files/HES APC documentation.pdf](https://cprd.com/sites/default/files/HES%20APC%20documentation.pdf). Accessed 20 May 2019
3. Office for National Statistics (2015) Harmonised Concepts and Questions for Social Data Sources: Primary Principles. Ethnic Group. <https://www.ons.gov.uk/ons/guide-method/harmonisation/primary-set-of-harmonised-concepts-and-questions/ethnic-group.pdf>. Accessed 10 Sep 2016

## Missing data.

### Key differences in missingness

Missingness ranged between ~12-30% in people with type 2 diabetes and 36~70% in controls without diabetes (**ESM Table 1**).

People with missing data were more likely to be female with fewer prescriptions for antidiabetic medications, antihypertensives, lipid-lowering agents and antiplatelets (**ESM Table 2**). The lower rates of drug prescriptions in those with missing data may be related to the greater proportion of females in this group; it has shown previously that women tend to receive less treatment (initiation and intensification) for many modifiable risk factors.[4, 5] Missing data and lower prescribing may also be related to healthcare utilisation;[6] each interaction with the health care system and health care professionals provides an opportunity for documentation and implementation and modification of treatment interventions.

It is important to note that there were no clinically meaningful differences in biological factor measurements between those with and without any missing data within type 2 diabetes and control groups across the full cohort or when stratified by sex or ethnicity (**ESM Tables 2-4**).

### References

4. Wright AK, Kontopantelis E, Emsley R, et al (2019) Cardiovascular Risk and Risk Factor Management in Type 2 Diabetes Mellitus: A Population-Based Cohort Study Assessing Sex Disparities. *Circulation* 139(24):2742–2753
5. Wexler D, Grant R, Meigs J, Nathan D, Cagliero E (2005) Sex disparities in treatment of cardiac risk factors in patients with type 2 diabetes. *Diabetes Care* 28(3):514–520
6. Wells BJ, Nowacki AS, Chagin K, Kattan MW (2013) Strategies for Handling Missing Data in Electronic Health Record Derived Data. *eGEMs (Generating Evid Methods to Improv patient outcomes)* 1(3):7

### Imputation model

Variables included in the imputation model were: BMI, weight, height, blood pressure (systolic and diastolic), total cholesterol, HDL cholesterol, non-HDL cholesterol, triacylglycerol, sex, age, ethnicity, deprivation, calendar year, general practice, cardiovascular disease, renal disease, and drug prescriptions for antidiabetic medications, antihypertensive agents, lipid-lowering medications and antiplatelet agents.

**ESM Table 1.** Proportion of people with type 2 diabetes and controls with missing data on risk factors by sex and ethnicity

|                                    | All     | Men     | Women   | White   | South Asian | Black  |
|------------------------------------|---------|---------|---------|---------|-------------|--------|
| <b>Type 2 diabetes, N</b>          | 187,601 | 103,607 | 83,994  | 143,481 | 9,486       | 4,451  |
| <b>Controls, N</b>                 | 906,182 | 495,778 | 410,404 | 652,388 | 13,917      | 10,532 |
| <b>BMI, kg/m<sup>2</sup></b>       |         |         |         |         |             |        |
| <i>Type 2 diabetes</i>             | 18.6    | 17.7    | 19.6    | 17.9    | 23.3        | 24.0   |
| <i>Controls</i>                    | 63.9    | 66.9    | 60.3    | 59.4    | 59.9        | 59.5   |
| <b>Weight, kg</b>                  |         |         |         |         |             |        |
| <i>Type 2 diabetes</i>             | 17.0    | 16.2    | 17.9    | 16.4    | 21.4        | 22.4   |
| <i>Controls</i>                    | 62.9    | 66.0    | 59.1    | 58.3    | 59.0        | 58.6   |
| <b>Total cholesterol, mmol/l</b>   |         |         |         |         |             |        |
| <i>Type 2 diabetes</i>             | 16.8    | 15.9    | 18.0    | 16.2    | 20.6        | 22.4   |
| <i>Controls</i>                    | 62.4    | 62.5    | 62.2    | 57.6    | 55.5        | 60.5   |
| <b>HDL cholesterol, mmol/l</b>     |         |         |         |         |             |        |
| <i>Type 2 diabetes</i>             | 28.9    | 28.1    | 29.9    | 28.6    | 28.8        | 30.6   |
| <i>Controls</i>                    | 68.9    | 67.0    | 68.9    | 65.0    | 59.8        | 63.9   |
| <b>non-HDL cholesterol, mmol/l</b> |         |         |         |         |             |        |
| <i>Type 2 diabetes</i>             | 29.0    | 28.2    | 29.9    | 28.6    | 28.9        | 30.6   |
| <i>Controls</i>                    | 69.0    | 69.0    | 68.9    | 65.0    | 59.9        | 63.9   |
| <b>Triacylglycerol, mmol/l</b>     |         |         |         |         |             |        |
| <i>Type 2 diabetes</i>             | 29.9    | 28.8    | 31.3    | 29.9    | 28.4        | 29.3   |
| <i>Controls</i>                    | 70.7    | 70.7    | 70.8    | 67.2    | 60.4        | 64.3   |
| <b>Blood pressure, mmHg</b>        |         |         |         |         |             |        |
| <i>Type 2 diabetes</i>             | 12.5    | 12.4    | 12.7    | 11.9    | 18.1        | 18.3   |
| <i>Controls</i>                    | 36.4    | 42.2    | 29.4    | 30.1    | 36.6        | 37.6   |

**ESM Table 2.** Differences in clinical characteristics between those with and without missing data on biological risk factors

|                                                       | Type 2 diabetes<br>N=187,601 |                       |         | Controls without diabetes<br>N=906,182 |                       |         |
|-------------------------------------------------------|------------------------------|-----------------------|---------|----------------------------------------|-----------------------|---------|
|                                                       | Without<br>missing data      | With<br>missing data* | P-value | Without<br>missing data                | With<br>missing data* | P-value |
| <b>N (%)</b>                                          | 115,183 (61.4)               | 72,418 (38.6)         |         | 152,023 (16.8)                         | 754,159 (83.2)        |         |
| <b>Men</b>                                            | 64,752 (56.2)                | 38,855 (53.7)         | <0.001  | 83,139 (54.7)                          | 412,639 (54.7)        | 0.849   |
| <b>Age, years</b>                                     | 61.5±13.2                    | 62.6±15.4             | <0.001  | 66.0±11.2                              | 60.7±14.6             | <0.001  |
| <b>Ethnicity</b>                                      |                              |                       | <0.001  |                                        |                       | <0.001  |
| White                                                 | 88,382 (76.7)                | 55,099 (76.1)         |         | 125,949 (82.9)                         | 526,439 (69.8)        |         |
| South Asian                                           | 5,996 (5.2)                  | 3,490 (4.8)           |         | 3,126 (2.1)                            | 10,791 (1.4)          |         |
| Black                                                 | 2,768 (2.4)                  | 1,683 (2.3)           |         | 2,318 (1.5)                            | 8,214 (1.1)           |         |
| Other                                                 | 1,581 (1.4)                  | 899 (1.2)             |         | 1,332 (0.9)                            | 6,949 (0.9)           |         |
| Unknown                                               | 16,456 (14.3)                | 11,247 (15.5)         |         | 19,298 (12.7)                          | 201,766 (26.8)        |         |
| <b>Deprivation (IMD 2010)</b>                         |                              |                       | <0.001  |                                        |                       | <0.001  |
| IMD 1 (least)                                         | 21,599 (18.8)                | 12,691 (17.5)         |         | 32,135 (21.1)                          | 165,085 (21.9)        |         |
| IMD 2                                                 | 24,416 (21.2)                | 16,518 (22.8)         |         | 34,190 (22.5)                          | 176,196 (23.4)        |         |
| IMD 3                                                 | 23,061 (20.0)                | 15,476 (21.4)         |         | 29,965 (19.7)                          | 155,994 (20.7)        |         |
| IMD 4                                                 | 24,260 (21.1)                | 14,868 (20.5)         |         | 30,161 (19.8)                          | 142,993 (19.0)        |         |
| IMD 5 (most)                                          | 21,678 (18.8)                | 12,701 (17.5)         |         | 25,402 (16.7)                          | 112,838 (15.0)        |         |
| Unknown                                               | 169 (0.2)                    | 164 (0.2)             |         | 170 (0.1)                              | 1,053 (0.1)           |         |
| <b>Cardiovascular disease</b>                         | 22,046 (19.1)                | 15,719 (21.7)         | <0.001  | 24,687 (16.2)                          | 43,747 (5.8)          | <0.001  |
| <b>Renal disease<br/>(CKD stage≥4)</b>                | 1,151 (1.0)                  | 1,184 (1.6)           | <0.001  | 531 (0.4)                              | 1,850 (0.3)           | <0.001  |
| <b>Biological factors (±12 months from diagnosis)</b> |                              |                       |         |                                        |                       |         |
| <b>BMI</b>                                            | 31.5±6.8                     | 30.9±7.1              | <0.001  | 27.7±5.4                               | 26.9±5.6              | <0.001  |
| <b>Weight</b>                                         | 89.4±20.8                    | 87.3±21.6             | <0.001  | 78.6±17.3                              | 75.5±17.8             | <0.001  |
| <b>Total cholesterol</b>                              | 5.2±1.3                      | 5.1±1.3               | <0.001  | 5.2±1.2                                | 5.3±1.1               | <0.001  |
| <b>HDL-cholesterol</b>                                | 1.2±0.4                      | 1.2±0.4               | 0.079   | 1.5±0.4                                | 1.5±0.4               | 0.063   |
| <b>non-HDL cholesterol</b>                            | 4.0±1.3                      | 3.9±1.3               | <0.001  | 3.7±1.1                                | 3.8±1.1               | <0.001  |

|                                               |               |               |        |               |                |        |
|-----------------------------------------------|---------------|---------------|--------|---------------|----------------|--------|
| <b>Triacylglycerol</b>                        | 2.3±2.4       | 2.5±3.7       | <0.001 | 1.5±1.0       | 1.5±1.4        | 0.995  |
| <b>Blood pressure</b>                         |               |               |        |               |                |        |
| sBP                                           | 139±19        | 140±20        | <0.001 | 137±18        | 137±29         | 0.230  |
| dBP                                           | 81±11         | 81±12         | 0.059  | 79±10         | 80±10          | <0.001 |
| <b>Drug Prescriptions</b>                     |               |               |        |               |                |        |
| <b>Diabetes</b>                               |               |               |        |               |                |        |
| Any oral hypoglycaemic                        | 57,125 (49.6) | 25,564 (35.3) | <0.001 | -             | -              | -      |
| Metformin                                     | 47,749 (41.5) | 17,081 (23.6) | <0.001 | -             | -              | -      |
| Sulphonylurea                                 | 11,608 (10.1) | 9,056 (12.5)  | <0.001 | -             | -              | -      |
| Insulin                                       | 3,647 (3.2)   | 3,041 (4.2)   | <0.001 | -             | -              | -      |
| Other                                         | 2,229 (1.9)   | 853 (1.2)     | <0.001 | -             | -              | -      |
| <b>Antihypertensive agent</b>                 |               |               |        |               |                |        |
| Any                                           | 72,782 (63.2) | 30,220 (41.7) | <0.001 | 89,995 (59.2) | 183,781 (24.4) | <0.001 |
| Alpha-blocker                                 | 5,733 (5.0)   | 2,307 (3.2)   | <0.001 | 6,867 (4.5)   | 13,520 (1.8)   | <0.001 |
| Angiotensin-2 receptor blocker                | 12,444 (10.8) | 3,889 (5.4)   | <0.001 | 14,987 (9.9)  | 23,544 (3.1)   | <0.001 |
| ACE inhibitor                                 | 40,114 (34.8) | 15,080 (20.8) | <0.001 | 39,358 (25.9) | 65,867 (8.7)   | <0.001 |
| Beta-blocker                                  | 25,826 (22.4) | 10,494 (14.5) | <0.001 | 32,602 (21.5) | 60,306 (8.0)   | <0.001 |
| Calcium channel blocker                       | 28,153 (24.4) | 10,456 (14.4) | <0.001 | 35,071 (23.1) | 61,844 (8.2)   | <0.001 |
| Diuretic: thiazide, potassium sparing or loop | 34,971 (30.4) | 16,572 (22.9) | <0.001 | 41,549 (27.3) | 100,133 (13.3) | <0.001 |
| <b>Lipid lowering therapy</b>                 |               |               |        |               |                |        |
| Any                                           | 63,604 (55.2) | 19,097 (26.4) | <0.001 | 63,723 (41.9) | 76,540 (10.2)  | <0.001 |
| <b>Antiplatelets</b>                          |               |               |        |               |                |        |
| Any                                           | 34,099 (29.6) | 14,632 (20.2) | <0.001 | 42,811 (28.2) | 72,155 (9.6)   | <0.001 |

Differences in patient characteristics between those with any missing data and without missing data on biological risk factors were assessed using t-tests (continuous factors) and chi-square tests (categorical factors).

Cardiovascular disease included MI, stroke, CHD, PVD and angina

\* Individuals included in the “with missing data” group had missing data on at least one of the biological factors; weight, blood pressure, total cholesterol, HDL cholesterol, non-HDL cholesterol, triacylglycerol

**ESM Table 3.** Differences in clinical characteristics between those with and without missing data on biological risk factors, by sex

|                                                       | Men                      |                    |         |                           |                    |         | Women                    |                    |         |                           |                    |         |
|-------------------------------------------------------|--------------------------|--------------------|---------|---------------------------|--------------------|---------|--------------------------|--------------------|---------|---------------------------|--------------------|---------|
|                                                       | Type 2 diabetes          |                    |         | Controls without diabetes |                    |         | Type 2 diabetes          |                    |         | Controls without diabetes |                    |         |
|                                                       | N=103,607                |                    |         | N=495,778                 |                    |         | N=83,994                 |                    |         | N=410,404                 |                    |         |
|                                                       | Without any missing data | With missing data* | P-value | Without any missing data  | With missing data* | P-value | Without any missing data | With missing data* | P-value | Without any missing data  | With missing data* | P-value |
| <b>N (%)</b>                                          | 64,752<br>(62.5)         | 38,855<br>(37.5)   |         | 83,139<br>(16.8)          | 412,639<br>(83.2)  |         | 50,431<br>(60.0)         | 33,563<br>(40.0)   |         | 68,884<br>(16.8)          | 341,520<br>(83.2)  |         |
| <b>Age, years</b>                                     | 60.4±12.7                | 60.5±14.5          | 0.080   | 65.1±10.9                 | 58.9±13.7          | <0.001  | 62.9±13.7                | 65.0±16.1          | <0.001  | 67.0±11.6                 | 62.9±15.3          | <0.001  |
| <b>Ethnicity</b>                                      |                          |                    | <0.001  |                           |                    | <0.001  |                          |                    | <0.001  |                           |                    | <0.001  |
| White                                                 | 76.2                     | 75.2               |         | 82.7                      | 66.6               |         | 77.4                     | 77.1               |         | 83.1                      | 73.7               |         |
| South Asian                                           | 5.0                      | 4.9                |         | 1.9                       | 1.4                |         | 5.5                      | 4.7                |         | 2.2                       | 1.5                |         |
| Black                                                 | 2.1                      | 2.1                |         | 1.2                       | 1.0                |         | 2.8                      | 2.5                |         | 1.9                       | 1.2                |         |
| Other                                                 | 1.4                      | 1.3                |         | 0.8                       | 0.9                |         | 1.4                      | 1.2                |         | 11.9                      | 1.0                |         |
| Unknown                                               | 15.3                     | 16.5               |         | 13.3                      | 30.1               |         | 12.9                     | 14.5               |         |                           | 22.7               |         |
| <b>Deprivation (IMD 2010)</b>                         |                          |                    | <0.001  |                           |                    | <0.001  |                          |                    | <0.001  |                           |                    | <0.001  |
| IMD 1 (least)                                         | 19.8                     | 17.9               |         | 22.4                      | 22.2               |         | 17.4                     | 17.1               |         | 19.6                      | 21.5               |         |
| IMD 2                                                 | 21.7                     | 23.5               |         | 23.1                      | 23.4               |         | 20.6                     | 22.0               |         | 21.8                      | 23.4               |         |
| IMD 3                                                 | 20.3                     | 21.4               |         | 19.8                      | 20.6               |         | 19.7                     | 21.3               |         | 19.6                      | 20.8               |         |
| IMD 4                                                 | 20.4                     | 20.3               |         | 19.0                      | 18.9               |         | 21.9                     | 20.8               |         | 20.8                      | 19.1               |         |
| IMD 5 (most)                                          | 17.7                     | 16.7               |         | 15.6                      | 14.9               |         | 20.3                     | 18.5               |         | 18.1                      | 15.1               |         |
| Unknown                                               | 0.1                      | 0.2                |         | 0.1                       | 0.1                |         | 0.2                      | 0.3                |         | 0.1                       | 0.1                |         |
| <b>Cardiovascular disease</b>                         | 21.9                     | 23.8               | <0.001  | 19.6                      | 6.3                | <0.001  | 15.6                     | 19.3               | <0.001  | 12.2                      | 5.2                | <0.001  |
| <b>Renal disease (CKD stage≥4)</b>                    | 1.0                      | 1.6                | <0.001  | 0.4                       | 0.3                | <0.001  | 1.0                      | 1.7                | <0.001  | 0.3                       | 0.3                | <0.001  |
| <b>Biological factors (±12 months from diagnosis)</b> |                          |                    |         |                           |                    |         |                          |                    |         |                           |                    |         |
| <b>BMI</b>                                            | 31.2±6.2                 | 30.9±6.5           | <0.001  | 27.9±4.8                  | 27.4±5.2           | <0.001  | 31.8±7.5                 | 31.0±7.8           | <0.001  | 27.5±5.9                  | 26.5±6.0           | <0.001  |
| <b>Weight</b>                                         | 94.5±19.7                | 92.7±20.4          | <0.001  | 84.7±15.8                 | 83.0±16.7          | <0.001  | 83.0±20.4                | 80.9±21.3          | <0.001  | 71.1±15.9                 | 69.1±16.3          | <0.001  |
| <b>Total cholesterol</b>                              | 5.1±1.3                  | 5.0±1.3            | <0.001  | 4.9±1.1                   | 5.1±1.1            | <0.001  | 5.4±1.3                  | 5.3±1.3            | <0.001  | 5.5±1.1                   | 5.5±1.1            | <0.001  |

|                                               |         |         |        |         |         |        |         |         |        |         |         |        |
|-----------------------------------------------|---------|---------|--------|---------|---------|--------|---------|---------|--------|---------|---------|--------|
| <b>HDL cholesterol</b>                        | 1.1±0.3 | 1.1±0.4 | 0.384  | 1.3±0.4 | 1.3±0.4 | <0.001 | 1.3±0.4 | 1.3±0.4 | 0.373  | 1.6±0.4 | 1.6±0.5 | <0.001 |
| <b>non-HDL cholesterol</b>                    | 3.9±1.3 | 3.8±1.3 | <0.001 | 3.6±1.1 | 3.8±1.1 | <0.001 | 4.0±1.3 | 3.9±1.3 | <0.001 | 3.8±1.1 | 3.9±1.1 | <0.001 |
| <b>Triacylglycerol</b>                        | 2.4±2.8 | 2.7±4.1 | <0.001 | 1.6±1.2 | 1.6±1.3 | 0.029  | 2.1±1.7 | 2.2±3.2 | <0.001 | 1.4±0.8 | 1.4±1.5 | 0.197  |
| <b>Blood pressure</b>                         |         |         |        |         |         |        |         |         |        |         |         |        |
| sBP                                           | 139±18  | 140±19  | <0.001 | 137±17  | 138±36  | <0.001 | 139±20  | 141±21  | <0.001 | 137±18  | 136±20  | <0.001 |
| dBP                                           | 82±11   | 81±11   | <0.001 | 80±11   | 80±11   | <0.001 | 80±11   | 80±12   | <0.001 | 79±10   | 79±10   | 0.067  |
| <b>Drug Prescriptions</b>                     |         |         |        |         |         |        |         |         |        |         |         |        |
| <b>Diabetes</b>                               |         |         |        |         |         |        |         |         |        |         |         |        |
| Any oral hypoglycaemic                        | 50.4    | 35.1    | <0.001 | -       | -       | -      | 48.5    | 35.6    | <0.001 | -       | -       | -      |
| Metformin                                     | 42.1    | 23.5    | <0.001 | -       | -       | -      | 40.7    | 23.7    | <0.001 | -       | -       | -      |
| Sulphonylurea                                 | 10.6    | 12.4    | <0.001 | -       | -       | -      | 9.5     | 12.6    | <0.001 | -       | -       | -      |
| Insulin                                       | 3.2     | 4.2     | <0.001 | -       | -       | -      | 3.2     | 4.2     | <0.001 | -       | -       | -      |
| Other                                         | 1.9     | 1.2     | <0.001 | -       | -       | -      | 2.0     | 1.2     | <0.001 | -       | -       | -      |
| <b>Antihypertensive agent</b>                 |         |         |        |         |         |        |         |         |        |         |         |        |
| Any                                           | 61.2    | 39.5    | <0.001 | 59.2    | 21.3    | <0.001 | 65.8    | 44.3    | <0.001 | 59.2    | 28.1    | <0.001 |
| Alpha-blocker                                 | 5.1     | 3.5     | <0.001 | 5.2     | 2.0     | <0.001 | 4.8     | 2.9     | <0.001 | 3.7     | 1.5     | <0.001 |
| Angiotensin-2 receptor blocker                | 9.5     | 4.7     | <0.001 | 8.9     | 2.6     | <0.001 | 12.5    | 6.1     | <0.001 | 11.1    | 3.8     | <0.001 |
| ACE inhibitor                                 | 36.9    | 21.8    | <0.001 | 29.1    | 8.8     | <0.001 | 32.2    | 19.8    | <0.001 | 22.0    | 8.7     | <0.001 |
| Beta-blocker                                  | 22.5    | 14.5    | <0.001 | 22.9    | 7.3     | <0.001 | 22.4    | 14.5    | <0.001 | 19.8    | 8.9     | <0.001 |
| Calcium channel blocker                       | 24.3    | 14.1    | <0.001 | 23.7    | 7.8     | <0.001 | 24.7    | 14.8    | <0.001 | 22.3    | 8.7     | <0.001 |
| Diuretic: thiazide, potassium sparing or loop | 24.5    | 18.4    | <0.001 | 22.7    | 9.6     | <0.001 | 37.9    | 28.1    | <0.001 | 33.0    | 17.7    | <0.001 |
| <b>Lipid lowering therapy</b>                 |         |         |        |         |         |        |         |         |        |         |         |        |
| Any                                           | 56.8    | 27.9    | <0.001 | 46.1    | 10.9    | <0.001 | 53.2    | 24.6    | <0.001 | 36.9    | 9.3     | <0.001 |
| <b>Antiplatelets</b>                          |         |         |        |         |         |        |         |         |        |         |         |        |
| Any                                           | 31.7    | 20.9    | <0.001 | 31.7    | 9.4     | <0.001 | 26.9    | 19.5    | <0.001 | 23.9    | 9.8     | <0.001 |

Differences in patient characteristics between those with any missing data and without missing data on biological risk factors are presented as % and mean±SD (where appropriate) and assessed using t-tests (continuous factors) and chi-square tests (categorical factors).

Cardiovascular disease included MI, stroke, CHD, PVD and angina

\* Individuals included in the “with missing data” group had missing data on at least one of the biological factors; weight, blood pressure, total cholesterol, HDL cholesterol, non-HDL cholesterol



**ESM Table 4.** Differences in clinical characteristics between those with and without missing data on biological risk factors, by ethnicity

|                                                       | WHITE                        |                    |         |                                        |                    |         | SOUTH ASIAN                |                    |         |                                       |                    |         |
|-------------------------------------------------------|------------------------------|--------------------|---------|----------------------------------------|--------------------|---------|----------------------------|--------------------|---------|---------------------------------------|--------------------|---------|
|                                                       | Type 2 diabetes<br>N=143,481 |                    |         | Controls without diabetes<br>N=652,388 |                    |         | Type 2 diabetes<br>N=9,486 |                    |         | Controls without diabetes<br>N=13,917 |                    |         |
|                                                       | Without any missing data     | With missing data* | P-value | Without any missing data               | With missing data* | P-value | Without any missing data   | With missing data* | P-value | Without any missing data              | With missing data* | P-value |
| <b>N (%)</b>                                          | 88,382<br>(61.6)             | 55,099<br>(38.4)   |         | 125,949<br>(19.3)                      | 526,439<br>(80.7)  |         | 5,996<br>(63.2)            | 3,490<br>(36.8)    |         | 3,126<br>(22.5)                       | 10,791<br>(77.5)   |         |
| <b>Men</b>                                            | 55.8                         | 53.1               | <0.001  | 54.6                                   | 52.2               | <0.001  | 54.0                       | 54.6               | 0.516   | 51.0                                  | 53.6               | 0.010   |
| <b>Age, years</b>                                     | 62.9±12.9                    | 64.0±15.0          | <0.001  | 66.8±11.0                              | 62.3±14.4          | <0.001  | 52.9±13.0                  | 52.1±14.2          | 0.007   | 59.1±12.0                             | 51.9±14.5          | <0.001  |
| <b>Deprivation (IMD 2010)</b>                         |                              |                    | <0.001  |                                        |                    | <0.001  |                            |                    | <0.001  |                                       |                    | 0.007   |
| IMD 1 (least)                                         | 18.8                         | 17.4               |         | 21.0                                   | 21.4               |         | 12.0                       | 14.8               |         | 12.6                                  | 12.4               |         |
| IMD 2                                                 | 22.1                         | 23.8               |         | 23.0                                   | 24.1               |         | 14.4                       | 15.5               |         | 17.6                                  | 15.7               |         |
| IMD 3                                                 | 20.1                         | 21.3               |         | 19.8                                   | 20.9               |         | 20.5                       | 21.0               |         | 20.9                                  | 22.2               |         |
| IMD 4                                                 | 20.7                         | 20.2               |         | 19.6                                   | 18.7               |         | 25.4                       | 22.3               |         | 23.6                                  | 25.9               |         |
| IMD 5 (most)                                          | 18.2                         | 17.0               |         | 16.5                                   | 14.8               |         | 27.6                       | 26.2               |         | 25.3                                  | 23.7               |         |
| Unknown                                               | 0.1                          | 0.2                |         | 0.1                                    | 0.1                |         | 0.2                        | 0.1                |         | <0.1                                  | 0.1                |         |
| <b>Cardiovascular disease</b>                         | 21.6                         | 23.9               | <0.001  | 17.3                                   | 6.7                | <0.001  | 11.6                       | 14.2               | <0.001  | 10.5                                  | 4.1                | <0.001  |
| <b>Renal disease<br/>(CKD stage≥4)</b>                | 1.1                          | 1.8                | <0.001  | 0.4                                    | 0.3                | <0.001  | 0.8                        | 1.7                | <0.001  | 0.7                                   | 0.5                | 0.13    |
| <b>Biological factors (±12 months from diagnosis)</b> |                              |                    |         |                                        |                    |         |                            |                    |         |                                       |                    |         |
| <b>BMI</b>                                            | 31.8±6.8                     | 31.2±7.2           | <0.001  | 27.7±5.4                               | 26.9±5.7           | <0.001  | 28.5±5.7                   | 28.3±6.3           | 0.289   | 26.8±4.8                              | 26.0±5.2           | <0.001  |
| <b>Weight</b>                                         | 90.5±20.9                    | 88.1±21.8          | <0.001  | 78.6±17.3                              | 75.5±17.9          | <0.001  | 77.6±16.1                  | 76.8±16.9          | 0.071   | 71.5±14.3                             | 68.9±14.7          | <0.001  |
| <b>Total cholesterol</b>                              | 5.2±1.3                      | 5.1±1.3            | <0.001  | 5.2±1.2                                | 5.2±1.2            | <0.001  | 5.1±1.2                    | 5.0±1.1            | 0.013   | 5.0±1.0                               | 5.1±1.0            | 0.004   |
| <b>HDL cholesterol</b>                                | 1.2±0.4                      | 1.2±0.4            | 0.226   | 1.5±0.4                                | 1.5±0.4            | <0.001  | 1.2±0.3                    | 1.2±0.4            | 0.347   | 1.4±0.4                               | 1.3±0.4            | 0.457   |
| <b>non-HDL cholesterol</b>                            | 3.9±1.3                      | 3.8±1.3            | <0.001  | 3.7±1.1                                | 3.8±1.1            | <0.001  | 3.9±1.2                    | 3.9±1.2            | 0.573   | 3.7±1.0                               | 3.8±1.0            | <0.001  |
| <b>Triacylglycerol</b>                                | 2.3±2.3                      | 2.5±3.3            | <0.001  | 1.5±1.1                                | 1.5±1.4            | 0.046   | 2.2±2.7                    | 2.6±6.8            | 0.004   | 1.5±0.9                               | 1.6±2.2            | 0.189   |
| <b>Blood pressure</b>                                 |                              |                    |         |                                        |                    |         |                            |                    |         |                                       |                    |         |
| sBP                                                   | 140±19                       | 141±20             | <0.001  | 137±18                                 | 137±31             | 0.369   | 133±18                     | 135±19             | <0.001  | 132±18                                | 129±18             | <0.001  |

|                                               |                                 |                           |                |                                  |                           |                |       |       |        |       |       |        |  |
|-----------------------------------------------|---------------------------------|---------------------------|----------------|----------------------------------|---------------------------|----------------|-------|-------|--------|-------|-------|--------|--|
| dBP                                           | 81±11                           | 80±11                     | <0.001         | 79±10                            | 79±10                     | <0.001         | 81±10 | 81±11 | 0.974  | 79±10 | 78±10 | 0.002  |  |
| <b>Drug Prescriptions</b>                     |                                 |                           |                |                                  |                           |                |       |       |        |       |       |        |  |
| <b>Diabetes</b>                               |                                 |                           |                |                                  |                           |                |       |       |        |       |       |        |  |
| Any oral hypoglycaemic                        | 48.3                            | 35.2                      | <0.001         | -                                | -                         | -              | 57.8  | 30.1  | <0.001 | -     | -     | -      |  |
| Metformin                                     | 40.1                            | 23.4                      | <0.001         | -                                | -                         | -              | 49.5  | 21.5  | <0.001 | -     | -     | -      |  |
| Sulphonylurea                                 | 9.7                             | 12.3                      | <0.001         | -                                | -                         | -              | 12.5  | 11.0  | 0.025  | -     | -     | -      |  |
| Insulin                                       | 3.2                             | 4.3                       | <0.001         | -                                | -                         | -              | 3.2   | 3.2   | 0.950  | -     | -     | -      |  |
| Other                                         | 1.9                             | 1.2                       | <0.001         | -                                | -                         | -              | 2.6   | 1.5   | <0.001 | -     | -     | -      |  |
| <b>Antihypertensive agent</b>                 |                                 |                           |                |                                  |                           |                |       |       |        |       |       |        |  |
| Any                                           | 66.3                            | 44.2                      | <0.001         | 60.7                             | 28.2                      | <0.001         | 44.8  | 22.3  | <0.001 | 44.9  | 15.9  | <0.001 |  |
| Alpha-blocker                                 | 5.3                             | 3.4                       | <0.001         | 4.7                              | 2.1                       | <0.001         | 2.9   | 1.3   | <0.001 | 3.5   | 1.4   | <0.001 |  |
| Angiotensin-2 receptor blocker                | 11.2                            | 5.6                       | <0.001         | 10.1                             | 3.7                       | <0.001         | 9.8   | 4.9   | <0.001 | 10.8  | 3.3   | <0.001 |  |
| ACE inhibitor                                 | 36.4                            | 22.0                      | <0.001         | 26.9                             | 10.2                      | <0.001         | 24.7  | 10.6  | <0.001 | 18.0  | 5.5   | <0.001 |  |
| Beta-blocker                                  | 24.3                            | 15.7                      | <0.001         | 22.3                             | 9.4                       | <0.001         | 13.1  | 7.6   | <0.001 | 15.5  | 5.2   | <0.001 |  |
| Calcium channel blocker                       | 25.1                            | 15.0                      | <0.001         | 23.3                             | 9.5                       | <0.001         | 17.7  | 8.7   | <0.001 | 20.4  | 7.0   | <0.001 |  |
| Diuretic: thiazide, potassium sparing or loop | 32.9                            | 24.8                      | <0.001         | 28.2                             | 15.3                      | <0.001         | 14.4  | 7.5   | <0.001 | 15.5  | 6.0   | <0.001 |  |
| <b>Lipid lowering therapy</b>                 |                                 |                           |                |                                  |                           |                |       |       |        |       |       |        |  |
| Any                                           | 57.1                            | 28.1                      | <0.001         | 43.9                             | 12.1                      | <0.001         | 48.6  | 17.2  | <0.001 | 32.9  | 8.8   | <0.001 |  |
| <b>Antiplatelets</b>                          |                                 |                           |                |                                  |                           |                |       |       |        |       |       |        |  |
| Any                                           | 32.0                            | 21.9                      | <0.001         | 30.0                             | 11.5                      | <0.001         | 22.5  | 11.6  | <0.001 | 20.4  | 6.1   | <0.001 |  |
|                                               | <b>BLACK</b>                    |                           |                |                                  |                           |                |       |       |        |       |       |        |  |
|                                               | <b>Type 2 diabetes</b>          |                           |                | <b>Controls without diabetes</b> |                           |                |       |       |        |       |       |        |  |
|                                               | <b>N=4,451</b>                  |                           |                | <b>N=10,532</b>                  |                           |                |       |       |        |       |       |        |  |
|                                               | <b>Without any missing data</b> | <b>With missing data*</b> | <b>P-value</b> | <b>Without any missing data</b>  | <b>With missing data*</b> | <b>P-value</b> |       |       |        |       |       |        |  |
| <b>N (%)</b>                                  | 2,768<br>(62.2)                 | 1,683<br>(37.8)           |                | 2,318<br>(22.0)                  | 8,214<br>(78.0)           |                |       |       |        |       |       |        |  |
| <b>Men</b>                                    | 49.6                            | 49.4                      | 0.932          | 44.3                             | 52.3                      | <0.001         |       |       |        |       |       |        |  |
| <b>Age, years</b>                             | 54.2±12.9                       | 53.6±15.2                 | 0.192          | 57.7±11.5                        | 51.3±12.9                 | <0.001         |       |       |        |       |       |        |  |
| <b>Deprivation (IMD 2010)</b>                 |                                 |                           | <0.001         |                                  |                           | <0.001         |       |       |        |       |       |        |  |
| IMD 1 (least)                                 | 4.6                             | 5.7                       |                | 3.1                              | 4.6                       |                |       |       |        |       |       |        |  |

|                                                       |           |           |        |           |           |        |
|-------------------------------------------------------|-----------|-----------|--------|-----------|-----------|--------|
| IMD 2                                                 | 7.5       | 9.3       |        | 5.7       | 7.9       |        |
| IMD 3                                                 | 14.6      | 18.4      |        | 11.5      | 15.5      |        |
| IMD 4                                                 | 32.6      | 31.9      |        | 34.9      | 32.4      |        |
| IMD 5 (most)                                          | 40.6      | 34.4      |        | 44.7      | 39.5      |        |
| Unknown                                               | 0.1       | 0.2       |        | 0.2       | 0.2       |        |
| <b>Cardiovascular disease</b>                         | 7.0       | 9.9       | 0.001  | 5.5       | 2.4       | <0.001 |
| <b>Renal disease<br/>(CKD stage≥4)</b>                | 1.0       | 1.6       | 0.083  | 0.5       | 0.6       | 0.452  |
| <b>Biological factors (±12 months from diagnosis)</b> |           |           |        |           |           |        |
| <b>BMI</b>                                            | 31.2±6.6  | 30.6±6.6  | 0.047  | 29.5±5.7  | 28.5±5.9  | <0.001 |
| <b>Weight</b>                                         | 88.3±18.9 | 85.5±19.4 | 0.001  | 82.2±16.2 | 79.9±16.9 | <0.001 |
| <b>Total cholesterol</b>                              | 5.1±1.2   | 5.0±1.2   | 0.122  | 5.1±1.0   | 5.1±1.1   | 0.421  |
| <b>HDL cholesterol</b>                                | 1.3±0.4   | 1.3±0.5   | 0.105  | 1.5±0.4   | 1.5±0.4   | 0.006  |
| <b>non-HDL cholesterol</b>                            | 3.8±1.2   | 3.6±1.2   | 0.018  | 3.6±1.0   | 3.6±1.0   | 0.274  |
| <b>Triacylglycerol</b>                                | 1.5±1.5   | 1.5±1.4   | 0.100  | 1.1±0.7   | 1.1±0.5   | 0.737  |
| <b>Blood pressure</b>                                 |           |           |        |           |           |        |
| sBP                                                   | 137±18    | 139±20    | 0.004  | 136±18    | 134±27    | 0.001  |
| dBP                                                   | 83±11     | 82±11     | 0.274  | 82±11     | 81±11     | <0.001 |
| <b>Drug Prescriptions</b>                             |           |           |        |           |           |        |
| <b>Diabetes</b>                                       |           |           |        |           |           |        |
| Any oral hypoglycaemic                                | 62.9      | 32.9      | <0.001 | -         | -         | -      |
| Metformin                                             | 52.4      | 22.0      | <0.001 | -         | -         | -      |
| Sulphonylurea                                         | 14.6      | 11.4      | 0.002  | -         | -         | -      |
| Insulin                                               | 6.1       | 6.2       | 0.896  | -         | -         | -      |
| Other                                                 | 2.6       | 1.0       | <0.001 | -         | -         | -      |
| <b>Antihypertensive agent</b>                         |           |           |        |           |           |        |
| Any                                                   | 53.4      | 25.3      | <0.001 | 49.5      | 17.6      | <0.001 |
| Alpha-blocker                                         | 6.1       | 3.4       | <0.001 | 6.0       | 2.1       | <0.001 |
| Angiotensin-2 receptor blocker                        | 9.5       | 4.3       | <0.001 | 8.5       | 3.0       | <0.001 |
| ACE inhibitor                                         | 26.4      | 10.9      | <0.001 | 14.5      | 4.9       | <0.001 |
| Beta-blocker                                          | 11.6      | 7.9       | <0.001 | 10.3      | 4.4       | <0.001 |

|                                               |      |      |        |      |      |        |
|-----------------------------------------------|------|------|--------|------|------|--------|
| Calcium channel blocker                       | 33.6 | 15.0 | <0.001 | 33.6 | 11.1 | <0.001 |
| Diuretic: thiazide, potassium sparing or loop | 24.1 | 12.0 | <0.001 | 22.4 | 8.5  | <0.001 |
| <b>Lipid lowering therapy</b>                 |      |      |        |      |      |        |
| Any                                           | 41.3 | 13.2 | <0.001 | 19.8 | 5.5  | <0.001 |
| <b>Antiplatelets</b>                          |      |      |        |      |      |        |
| Any                                           | 18.6 | 9.6  | <0.001 | 11.7 | 3.7  | <0.001 |

Differences in patient characteristics between those with any missing data and without missing data on biological risk factors are presented as % and mean±SD (where appropriate) and assessed using t-tests (continuous factors) and chi-square tests (categorical factors).

Cardiovascular disease included MI, stroke, CHD, PVD and angina.

\* Individuals included in the “with missing data” group had missing data on at least one of the biological factors; weight, blood pressure, total cholesterol, HDL cholesterol, non-HDL cholesterol

ESM Table 5. Baseline characteristics of controls without diabetes

|                                                       | All            | Men            | Women          | White          | South Asian  | Black        |
|-------------------------------------------------------|----------------|----------------|----------------|----------------|--------------|--------------|
| <b>N</b>                                              | 906,182        | 495,778        | 410,404        | 652,388        | 13,917       | 10,532       |
| <b>Men, n (%)</b>                                     | 495,778 (54.7) | -              | -              | 343,347 (52.6) | 7,377 (53.0) | 5,324 (50.6) |
| <b>Age, years</b>                                     | 61.6 ± 14.2    | 59.9 ± 13.4    | 63.5 ± 14.8    | 63.2 ± 13.9    | 53.5 ± 14.3  | 52.7 ± 12.9  |
| <b>Age group</b>                                      |                |                |                |                |              |              |
| 20-39                                                 | 59,989 (6.6)   | 33,895 (6.8)   | 26,094 (6.4)   | 34,749 (5.3)   | 2,518 (18.1) | 1,496 (14.2) |
| 40-49                                                 | 128,893 (14.2) | 79,785 (16.1)  | 49,108 (12.0)  | 78,113 (12.0)  | 3,209 (23.1) | 3,232 (30.7) |
| 50-59                                                 | 206,230 (22.8) | 125,128 (25.2) | 81,102 (19.8)  | 137,838 (21.1) | 3,430 (24.7) | 2,787 (26.5) |
| 60-69                                                 | 231,378 (25.5) | 131,432 (26.5) | 99,946 (24.4)  | 174,795 (26.8) | 2,606 (18.7) | 1,702 (16.2) |
| 70-79                                                 | 180,942 (20.0) | 88,160 (17.8)  | 92,782 (22.6)  | 145,731 (22.3) | 1,668 (12.0) | 1,074 (10.2) |
| ≥80                                                   | 98,750 (10.9)  | 37,378 (7.5)   | 61,372 (15.0)  | 81,162 (12.4)  | 486 (3.5)    | 241 (2.3)    |
| <b>Ethnicity</b>                                      |                |                |                |                |              |              |
| White                                                 | 652,388 (72.0) | 343,347 (69.3) | 309,041 (75.3) | -              | -            | -            |
| South Asian                                           | 13,917 (1.5)   | 7,377 (1.5)    | 6,540 (1.6)    | -              | -            | -            |
| Black                                                 | 10,532 (1.2)   | 5,324 (1.1)    | 5,208 (1.3)    | -              | -            | -            |
| Other                                                 | 8,281 (0.9)    | 4,376 (1.0)    | 3,905 (1.0)    | -              | -            | -            |
| Unknown                                               | 221,064 (24.4) | 135,354 (27.3) | 85,710 (20.9)  | -              | -            | -            |
| <b>Deprivation (IMD 2010)</b>                         |                |                |                |                |              |              |
| IMD 1 (least)                                         | 197,220 (21.8) | 110,171 (22.2) | 87,049 (21.2)  | 138,961 (21.3) | 1,732 (12.5) | 447 (4.2)    |
| IMD 2                                                 | 210,386 (23.2) | 115,567 (23.3) | 94,819 (23.1)  | 155,940 (23.9) | 2,245 (16.1) | 781 (7.4)    |
| IMD 3                                                 | 185,959 (20.5) | 101,532 (20.5) | 84,427 (20.6)  | 134,748 (20.7) | 3,047 (21.9) | 1,541 (14.6) |
| IMD 4                                                 | 173,154 (19.1) | 93,594 (18.9)  | 79,560 (19.4)  | 123,072 (18.9) | 3,534 (25.4) | 3,467 (32.9) |
| IMD 5 (most)                                          | 138,240 (15.3) | 74,241 (15.0)  | 63,999 (15.6)  | 98,814 (15.2)  | 3,350 (24.1) | 4,277 (40.6) |
| Unknown                                               | 1,223 (0.1)    | 673 (0.1)      | 550 (0.1)      | 853 (0.1)      | 9 (0.1)      | 19 (0.2)     |
| <b>Cardiovascular disease</b>                         | 68,434 (7.6)   | 42,280 (8.5)   | 26,154 (6.4)   | 57,015 (8.7)   | 765 (5.5)    | 322 (3.1)    |
| <b>Renal disease (CKD stage≥4)</b>                    | 2,381 (0.3)    | 1,320 (0.3)    | 1,061 (0.3)    | 1,942 (0.3)    | 70 (0.5)     | 61 (0.6)     |
| <b>Biological factors (±12 months from diagnosis)</b> |                |                |                |                |              |              |
| <b>BMI, kg/m<sup>2</sup></b>                          | 27.3 ± 5.5     | 27.6 ± 5.0     | 26.9 ± 6.0     | 27.3 ± 5.5     | 26.5 ± 5.0   | 29.0 ± 5.8   |
| missing (%)                                           | 63.9           | 66.9           | 60.3           | 59.4           | 59.9         | 59.5         |
| <b>Weight, kg</b>                                     | 76.9 ± 17.7    | 83.8 ± 16.3    | 69.9 ± 16.2    | 77.0 ± 17.7    | 70.3 ± 14.6  | 81.1 ± 16.6  |
| missing (%)                                           | 62.9           | 66.0           | 59.1           | 58.3           | 59.0         | 58.6         |
| <b>Total cholesterol, mmol/l</b>                      | 5.2 ± 1.2      | 5.0 ± 1.1      | 5.5 ± 1.1      | 5.2 ± 1.2      | 5.0 ± 1.0    | 5.1 ± 1.0    |
| missing (%)                                           | 62.4           | 62.5           | 62.2           | 57.6           | 55.5         | 60.5         |
| <b>HDL cholesterol, mmol/l</b>                        | 1.5 ± 0.4      | 1.3 ± 0.4      | 1.6 ± 0.4      | 1.5 ± 0.4      | 1.3 ± 0.4    | 1.5 ± 0.4    |
| missing (%)                                           | 68.9           | 67.0           | 68.9           | 65.0           | 59.8         | 63.9         |
| <b>non-HDL cholesterol, mmol/l</b>                    | 3.8 ± 1.1      | 3.7 ± 1.1      | 3.9 ± 1.1      | 3.7 ± 1.1      | 3.7 ± 1.0    | 3.6 ± 1.0    |
| missing (%)                                           | 69.0           | 69.0           | 68.9           | 65.0           | 59.9         | 63.9         |
| <b>Triacylglycerol, mmol/l</b>                        | 1.5 ± 1.2      | 1.6 ± 1.3      | 1.4 ± 1.2      | 1.5 ± 1.2      | 1.6 ± 1.6    | 1.1 ± 0.6    |
| missing (%)                                           | 70.7           | 70.7           | 70.8           | 67.2           | 60.4         | 64.3         |
| <b>Blood pressure, mmHg</b>                           |                |                |                |                |              |              |
| sBP                                                   | 137 ± 26       | 137 ± 32       | 137 ± 20       | 137 ± 28       | 131 ± 18     | 134 ± 24     |
| dBP                                                   | 79 ± 10        | 80 ± 11        | 79 ± 10        | 79 ± 10        | 79 ± 10      | 81 ± 11      |
| missing (%)                                           | 36.4           | 42.2           | 29.4           | 30.1           | 36.6         | 37.6         |
| <b>Drug Prescriptions</b>                             |                |                |                |                |              |              |

|                                               |      |      |      |      |      |      |
|-----------------------------------------------|------|------|------|------|------|------|
| <b>Diabetes</b>                               |      |      |      |      |      |      |
| Any oral hypoglycaemic                        | 0    | 0    | 0    | 0    | 0    | 0    |
| Metformin                                     | 0    | 0    | 0    | 0    | 0    | 0    |
| Sulphonylurea                                 | 0    | 0    | 0    | 0    | 0    | 0    |
| Insulin                                       | 0    | 0    | 0    | 0    | 0    | 0    |
| Other                                         | 0    | 0    | 0    | 0    | 0    | 0    |
| <b>Antihypertensive agent</b>                 |      |      |      |      |      |      |
| Any                                           | 30.2 | 27.6 | 33.3 | 34.5 | 22.4 | 24.6 |
| Alpha-blocker                                 | 2.3  | 2.6  | 1.9  | 2.6  | 1.8  | 3.0  |
| Angiotensin-2 receptor blocker                | 4.3  | 3.7  | 5.0  | 4.9  | 5.0  | 4.2  |
| ACE inhibitor                                 | 11.6 | 12.2 | 10.9 | 13.4 | 8.3  | 7.0  |
| Beta-blocker                                  | 10.3 | 9.9  | 10.7 | 11.9 | 7.5  | 5.7  |
| Calcium channel blocker                       | 10.7 | 10.5 | 11.0 | 12.1 | 10.0 | 16.0 |
| Diuretic: thiazide, potassium sparing or loop | 15.6 | 11.8 | 20.2 | 17.8 | 8.1  | 11.6 |
| <b>Lipid lowering therapy</b>                 |      |      |      |      |      |      |
| Any                                           | 15.5 | 16.8 | 13.9 | 18.3 | 14.2 | 8.6  |
| <b>Antiplatelets</b>                          |      |      |      |      |      |      |
| Any                                           | 12.7 | 13.1 | 12.2 | 15.1 | 9.3  | 5.5  |

Data are mean±SD, n(%) or %, where appropriate

Cardiovascular disease included MI, stroke, CHD, PVD and angina

**ESM Table 6.** Adjusted age-specific mean (95% CI) differences in biological risk factor levels in people with newly diagnosed type 2 diabetes compared to matched people without diabetes

| Biological risk factor                   | Age          | T2DM        | Non-T2DM    | Adjusted mean difference | P-value |
|------------------------------------------|--------------|-------------|-------------|--------------------------|---------|
| <b>BMI</b><br>(kg/m <sup>2</sup> )       | <b>20-39</b> | 34.6 ± 8.8  | 27.9 ± 7.4  | 6.7 (6.6,6.8)            | <0.001  |
|                                          | <b>40-49</b> | 33.8 ± 8.2  | 28.0 ± 7.5  | 5.8 (5.7,5.9)            | <0.001  |
|                                          | <b>50-59</b> | 32.6 ± 7.4  | 27.7 ± 5.7  | 4.9 (4.8,5.0)            | <0.001  |
|                                          | <b>60-69</b> | 31.0 ± 6.5  | 27.2 ± 5.6  | 3.8 (3.7,3.9)            | <0.001  |
|                                          | <b>70-79</b> | 29.2 ± 6.2  | 26.2 ± 6.6  | 2.9 (2.8,3.0)            | <0.001  |
|                                          | <b>≥80</b>   | 26.6 ± 6.1  | 24.8 ± 6.1  | 1.8 (1.7,1.9)            | <0.001  |
| <b>Weight</b><br>(m)                     | <b>20-39</b> | 99.7 ± 27.3 | 81.0 ± 22.5 | 18.7 (18.3,19.1)         | <0.001  |
|                                          | <b>40-49</b> | 97.9 ± 23.8 | 81.6 ± 27.3 | 16.4 (16.0,16.7)         | <0.001  |
|                                          | <b>50-59</b> | 93.7 ± 21.5 | 79.9 ± 18.9 | 13.8 (13.7,14.0)         | <0.001  |
|                                          | <b>60-69</b> | 88.2 ± 19.8 | 77.4 ± 16.9 | 10.7(10.6,10.9)          | <0.001  |
|                                          | <b>70-79</b> | 81.2 ± 18.6 | 73.2 ± 20.5 | 8.1 (7.8,8.3)            | <0.001  |
|                                          | <b>≥80</b>   | 72.1 ± 17.0 | 66.9 ± 18.5 | 5.3 (5.0,5.5)            | <0.001  |
| <b>Systolic blood pressure</b><br>(mmHg) | <b>20-39</b> | 131 ± 17    | 124 ± 19    | 7 (6,7)                  | <0.001  |
|                                          | <b>40-49</b> | 135 ± 20    | 129 ± 24    | 6 (5,6)                  | <0.001  |
|                                          | <b>50-59</b> | 139 ± 22    | 134 ± 20    | 5 (4,5)                  | <0.001  |
|                                          | <b>60-69</b> | 141 ± 19    | 138 ± 36    | 3 (3,4)                  | <0.001  |
|                                          | <b>70-79</b> | 142 ± 20    | 141 ± 20    | 1 (0.8,1.2)              | <0.001  |
|                                          | <b>≥80</b>   | 141 ± 22    | 141 ± 22    | -0.5 (-0.9,-0.2)         | 0.055   |
| <b>Total cholesterol</b><br>(mmol/l)     | <b>20-39</b> | 5.5 ± 2.1   | 5.7 ± 2.3   | -0.2 (-0.2,-0.1)         | <0.001  |
|                                          | <b>40-49</b> | 5.5 ± 1.4   | 5.6 ± 2.2   | -0.1 (-0.1,0)            | <0.001  |
|                                          | <b>50-59</b> | 5.4 ± 1.3   | 5.6 ± 1.5   | -0.2 (-0.2,-0.1)         | <0.001  |
|                                          | <b>60-69</b> | 5.2 ± 1.3   | 5.5 ± 1.5   | -0.3 (-0.3,-0.2)         | <0.001  |
|                                          | <b>70-79</b> | 5.0 ± 1.4   | 5.3 ± 1.4   | -0.3 (-0.4,-0.3)         | <0.001  |
|                                          | <b>≥80</b>   | 4.9 ± 1.4   | 5.3 ± 1.6   | -0.3 (-0.3,-0.2)         | <0.001  |
| <b>HDL cholesterol</b><br>(mmol/l)       | <b>20-39</b> | 1.1 ± 0.4   | 1.4 ± 0.4   | -0.3 (-0.3,-0.2)         | <0.001  |
|                                          | <b>40-49</b> | 1.1 ± 0.4   | 1.4 ± 0.5   | -0.3 (-0.3,-0.2)         | <0.001  |
|                                          | <b>50-59</b> | 1.2 ± 0.4   | 1.4 ± 0.5   | -0.3 (-0.3,-0.2)         | <0.001  |
|                                          | <b>60-69</b> | 1.2 ± 0.4   | 1.5 ± 0.6   | -0.2 (-0.3,-0.2)         | <0.001  |
|                                          | <b>70-79</b> | 1.3 ± 0.4   | 1.5 ± 1.0   | -0.2 (-0.2,-0.1)         | <0.001  |
|                                          | <b>≥80</b>   | 1.4 ± 0.5   | 1.6 ± 0.6   | -0.2 (-0.2,-0.1)         | <0.001  |
| <b>non-HDL cholesterol</b><br>(mmol/l)   | <b>20-39</b> | 4.4 ± 2.1   | 4.3 ± 2.4   | 0.1 (0.1,0.2)            | <0.001  |
|                                          | <b>40-49</b> | 4.4 ± 1.4   | 4.2 ± 2.2   | 0.2 (0.1,0.2)            | <0.001  |
|                                          | <b>50-59</b> | 4.2 ± 1.3   | 4.2 ± 1.6   | 0.1 (0,0.1)              | <0.001  |
|                                          | <b>60-69</b> | 3.9 ± 1.3   | 4.0 ± 1.3   | -0.1 (-0.1,0)            | <0.001  |
|                                          | <b>70-79</b> | 3.7 ± 1.3   | 3.8 ± 1.4   | -0.1 (-0.2,-0.1)         | <0.001  |
|                                          | <b>≥80</b>   | 3.6 ± 1.4   | 3.7 ± 1.4   | -0.1 (-0.1,0)            | <0.001  |
| <b>Triacylglycerol</b><br>(mmol/l)       | <b>20-39</b> | 3.0 ± 5.9   | 1.6 ± 2.3   | 1.4 (1.3,1.5)            | <0.001  |
|                                          | <b>40-49</b> | 2.8 ± 4.3   | 1.6 ± 2.5   | 1.2 (1.2,1.3)            | <0.001  |
|                                          | <b>50-59</b> | 2.5 ± 3.4   | 1.5 ± 1.9   | 1.0 (0.9,1.0)            | <0.001  |
|                                          | <b>60-69</b> | 2.2 ± 2.3   | 1.5 ± 1.4   | 0.7 (0.6,0.7)            | <0.001  |
|                                          | <b>70-79</b> | 1.9 ± 1.9   | 1.4 ± 1.4   | 0.5 (0.4,0.5)            | <0.001  |
|                                          | <b>≥80</b>   | 1.7 ± 1.7   | 1.3 ± 1.2   | 0.4 (0.3,0.4)            | <0.001  |

Data are mean (95% CI) differences in risk factor levels between people with type 2 diabetes and controls without diabetes (level in people with type 2 diabetes minus level in controls). Differences are adjusted for between group differences in age, sex, general practice and deprivation

**ESM Table 7.** Adjusted age-specific mean (95% CI) differences in biological risk factor levels in men and women newly diagnosed with type 2 diabetes compared with people without diabetes

| Biological risk factors                  | Age          | Men          |             |                                   |         | Women       |             |                                   |         |
|------------------------------------------|--------------|--------------|-------------|-----------------------------------|---------|-------------|-------------|-----------------------------------|---------|
|                                          |              | T2DM         | Non-T2DM    | Adjusted mean difference (95% CI) | P-value | T2DM        | Non-T2DM    | Adjusted mean difference (95% CI) | P-value |
| <b>BMI</b><br>(kg/m <sup>2</sup> )       | <b>20-39</b> | 34.1 ± 8.5   | 28.9 ± 8.9  | 5.2 (5.0,5.3)                     | <0.001  | 35.3 ± 9.5  | 26.6 ± 6.7  | 8.6 (8.4,8.9)                     | <0.001  |
|                                          | <b>40-49</b> | 33.1 ± 7.7   | 28.6 ± 7.6  | 4.5 (4.4,4.6)                     | <0.001  | 35.1 ± 8.7  | 27.1 ± 6.9  | 7.9 (7.7,8.0)                     | <0.001  |
|                                          | <b>50-59</b> | 32.1 ± 6.7   | 28.1 ± 5.8  | 4.1 (4.0,4.1)                     | <0.001  | 33.3 ± 8.0  | 27.0 ± 7.2  | 6.2 (6.1,6.3)                     | <0.001  |
|                                          | <b>60-69</b> | 30.8 ± 5.9   | 27.5 ± 5.9  | 3.3 (3.2,3.4)                     | <0.001  | 31.3 ± 7.1  | 26.7 ± 5.9  | 4.5 (4.4,4.6)                     | <0.001  |
|                                          | <b>70-79</b> | 29.0 ± 5.4   | 26.6 ± 5.8  | 2.4 (2.3,2.5)                     | <0.001  | 29.3 ± 6.7  | 25.9 ± 6.2  | 3.4 (3.3,3.5)                     | <0.001  |
|                                          | <b>≥80</b>   | 27.1 ± 5.1   | 25.4 ± 5.5  | 1.7 (1.6,1.8)                     | <0.001  | 26.3 ± 6.2  | 24.4 ± 5.7  | 1.9 (1.8,2.0)                     | <0.001  |
| <b>Weight</b><br>(m)                     | <b>20-39</b> | 103.3 ± 27.5 | 88.2 ± 25.2 | 15.2 (14.6,15.7)                  | <0.001  | 95.0 ± 27.0 | 71.7 ± 18.8 | 23.1 (22.5,23.7)                  | <0.001  |
|                                          | <b>40-49</b> | 100.7 ± 24.2 | 87.2 ± 25.3 | 13.6 (13.2,14.0)                  | <0.001  | 93.3 ± 24.0 | 72.5 ± 21.3 | 20.7 (20.3,21.1)                  | <0.001  |
|                                          | <b>50-59</b> | 97.6 ± 20.9  | 85.3 ± 17.4 | 12.3 (12.1,12.6)                  | <0.001  | 87.7 ± 21.4 | 71.6 ± 19.7 | 16.0 (15.7,16.4)                  | <0.001  |
|                                          | <b>60-69</b> | 92.7 ± 18.6  | 83.0 ± 17.0 | 9.8 (9.6,10.0)                    | <0.001  | 81.9 ± 19.1 | 70.1 ± 15.1 | 11.7 (11.5,12.0)                  | <0.001  |
|                                          | <b>70-79</b> | 86.5 ± 17.2  | 79.6 ± 18.2 | 7.0 (6.7,7.3)                     | <0.001  | 75.9 ± 17.2 | 67.1 ± 16.9 | 8.7 (8.5,9.0)                     | <0.001  |
|                                          | <b>≥80</b>   | 79.6 ± 15.0  | 74.7 ± 18.7 | 4.9 (4.5,5.3)                     | <0.001  | 67.4 ± 15.4 | 62.1 ± 15.7 | 5.3 (5.0,5.6)                     | <0.001  |
| <b>Systolic blood pressure</b><br>(mmHg) | <b>20-39</b> | 133 ± 18     | 127 ± 23    | 6 (5,7)                           | <0.001  | 129 ± 17    | 121 ± 18    | 8 (7,9)                           | <0.001  |
|                                          | <b>40-49</b> | 136 ± 18     | 131 ± 24    | 5 (4,5)                           | <0.001  | 135 ± 22    | 127 ± 24    | 8 (7,8)                           | <0.001  |
|                                          | <b>50-59</b> | 139 ± 22     | 135 ± 18    | 4 (3,4)                           | <0.001  | 139 ± 21    | 132 ± 20    | 6 (6,7)                           | <0.001  |
|                                          | <b>60-69</b> | 141 ± 20     | 138 ± 30    | 3 (2,3)                           | <0.001  | 142 ± 19    | 138 ± 22    | 4 (3,4)                           | <0.001  |
|                                          | <b>70-79</b> | 141 ± 20     | 140 ± 25    | 1 (1,2)                           | <0.001  | 143 ± 21    | 142 ± 22    | 1 (1,2)                           | <0.001  |
|                                          | <b>≥80</b>   | 139 ± 21     | 140 ± 22    | -1 (-1,0)                         | 0.002   | 142 ± 22    | 143 ± 23    | -0.3 (-0.7,0.1)                   | 0.132   |
| <b>Total cholesterol</b><br>(mmol/l)     | <b>20-39</b> | 5.5 ± 2.2    | 5.5 ± 1.9   | 0 (-0.1,0.1)                      | 0.973   | 5.4 ± 1.5   | 5.9 ± 1.9   | -0.4 (-0.5,-0.4)                  | <0.001  |
|                                          | <b>40-49</b> | 5.5 ± 1.5    | 5.5 ± 1.6   | 0 (-0.1,0.1)                      | 0.665   | 5.5 ± 1.3   | 5.8 ± 2.2   | -0.3 (-0.3,-0.2)                  | <0.001  |
|                                          | <b>50-59</b> | 5.3 ± 1.4    | 5.5 ± 1.3   | -0.1 (-0.2,-0.1)                  | <0.001  | 5.6 ± 1.4   | 5.8 ± 1.5   | -0.2 (-0.3,-0.2)                  | <0.001  |
|                                          | <b>60-69</b> | 5.0 ± 1.3    | 5.3 ± 1.3   | -0.3 (-0.3,-0.2)                  | <0.001  | 5.5 ± 1.4   | 5.8 ± 1.6   | -0.3 (-0.3,-0.2)                  | <0.001  |
|                                          | <b>70-79</b> | 4.7 ± 1.3    | 5.0 ± 1.2   | -0.3 (-0.3,-0.2)                  | <0.001  | 5.3 ± 1.4   | 5.6 ± 1.5   | -0.3 (-0.4,-0.3)                  | <0.001  |
|                                          | <b>≥80</b>   | 4.6 ± 1.3    | 4.9 ± 1.2   | -0.3 (-0.3,-0.2)                  | <0.001  | 5.2 ± 1.5   | 5.5 ± 1.7   | -0.3 (-0.3,-0.2)                  | <0.001  |
| <b>HDL cholesterol</b><br>(mmol/l)       | <b>20-39</b> | 1.0 ± 0.3    | 1.3 ± 0.4   | -0.2 (-0.3,-0.2)                  | <0.001  | 1.2 ± 0.4   | 1.6 ± 0.5   | -0.4 (-0.4,-0.3)                  | <0.001  |
|                                          | <b>40-49</b> | 1.1 ± 0.3    | 1.3 ± 0.4   | -0.2 (-0.2,-0.1)                  | <0.001  | 1.2 ± 0.4   | 1.6 ± 0.7   | -0.4 (-0.4,-0.3)                  | <0.001  |
|                                          | <b>50-59</b> | 1.1 ± 0.3    | 1.3 ± 0.4   | -0.2 (-0.2,-0.1)                  | <0.001  | 1.3 ± 0.4   | 1.6 ± 0.7   | -0.3 (-0.4,-0.3)                  | <0.001  |



|                                     |              |           |           |                  |        |           |           |                  |        |
|-------------------------------------|--------------|-----------|-----------|------------------|--------|-----------|-----------|------------------|--------|
|                                     | <b>60-69</b> | 1.2 ± 0.4 | 1.3 ± 0.6 | -0.2 (-0.2,-0.1) | <0.001 | 1.3 ± 0.4 | 1.6 ± 0.6 | -0.3 (-0.3,-0.2) | <0.001 |
|                                     | <b>70-79</b> | 1.2 ± 0.4 | 1.4 ± 0.6 | -0.2 (-0.2,-0.1) | <0.001 | 1.4 ± 0.4 | 1.7 ± 1.1 | -0.3 (-0.3,-0.2) | <0.001 |
|                                     | <b>≥80</b>   | 1.2 ± 0.4 | 1.4 ± 0.5 | -0.2 (-0.2,-0.1) | <0.001 | 1.5 ± 0.5 | 1.7 ± 0.6 | -0.2 (-0.3,-0.2) | <0.001 |
| <b>non-HDL cholesterol (mmol/l)</b> | <b>20-39</b> | 4.5 ± 2.2 | 4.3 ± 2.0 | 0.3 (0.2,0.3)    | <0.001 | 4.3 ± 1.5 | 4.3 ± 1.9 | 0 (-0.1,0.1)     | 0.705  |
|                                     | <b>40-49</b> | 4.4 ± 1.4 | 4.2 ± 1.7 | 0.2 (0.2,0.3)    | <0.001 | 4.3 ± 1.4 | 4.2 ± 2.3 | 0.1 (0.1,0.2)    | <0.001 |
|                                     | <b>50-59</b> | 4.2 ± 1.3 | 4.1 ± 1.4 | 0.1 (0,0.1)      | <0.001 | 4.3 ± 1.5 | 4.2 ± 1.5 | 0.1 (0.1,0.2)    | <0.001 |
|                                     | <b>60-69</b> | 3.8 ± 1.4 | 3.9 ± 1.2 | -0.1 (-0.1,0)    | <0.001 | 4.1 ± 1.4 | 4.1 ± 1.5 | -0.1 (-0.1,0)    | 0.024  |
|                                     | <b>70-79</b> | 3.5 ± 1.3 | 3.7 ± 1.2 | -0.1 (-0.2,-0.1) | <0.001 | 3.9 ± 1.4 | 4.0 ± 1.5 | -0.1 (-0.1,0)    | <0.001 |
|                                     | <b>≥80</b>   | 3.3 ± 1.3 | 3.5 ± 1.3 | -0.1 (-0.2,-0.1) | <0.001 | 3.7 ± 1.5 | 3.8 ± 1.4 | -0.1 (-0.2,-0.1) | <0.001 |
| <b>Triacylglycerol (mmol/l)</b>     | <b>20-39</b> | 3.4 ± 5.9 | 1.6 ± 1.9 | 1.8 (1.7,1.9)    | <0.001 | 2.5 ± 4.5 | 1.5 ± 2.0 | 1.0 (0.9,1.1)    | <0.001 |
|                                     | <b>40-49</b> | 3.1 ± 4.5 | 1.6 ± 2.5 | 1.4 (1.4,1.5)    | <0.001 | 2.4 ± 3.1 | 1.4 ± 1.5 | 0.9 (0.9,1.0)    | <0.001 |
|                                     | <b>50-59</b> | 2.6 ± 3.7 | 1.6 ± 1.9 | 1.0 (1.0,1.1)    | <0.001 | 2.3 ± 2.6 | 1.5 ± 1.7 | 0.8 (0.8,0.9)    | <0.001 |
|                                     | <b>60-69</b> | 2.2 ± 2.7 | 1.5 ± 1.6 | 0.7 (0.6,0.7)    | <0.001 | 2.1 ± 2.5 | 1.5 ± 1.3 | 0.7 (0.6,0.7)    | <0.001 |
|                                     | <b>70-79</b> | 1.9 ± 1.7 | 1.4 ± 1.5 | 0.5 (0.4,0.5)    | <0.001 | 1.9 ± 1.8 | 1.4 ± 1.0 | 0.5 (0.5,0.6)    | <0.001 |
|                                     | <b>≥80</b>   | 1.7 ± 1.5 | 1.3 ± 0.9 | 0.4 (0.3,0.4)    | <0.001 | 1.7 ± 1.7 | 1.3 ± 1.3 | 0.4 (0.3,0.4)    | <0.001 |

Data are mean (95% CI) differences in risk factor levels between men with T2DM and men without diabetes, and between women with T2DM and women without diabetes (e.g. level in people with T2DM minus level in controls). Differences are adjusted for between group differences in age, sex, general practice and deprivation

**ESM Table 8.** Adjusted age-specific mean (95% CI) differences in biological risk factor levels in Whites, South Asians and Blacks newly diagnosed with type 2 diabetes compared with people without diabetes

| Biological risk factors        | Age   | White        |             |                                   |         | South Asian |             |                                   |         | Black       |             |                                   |         |
|--------------------------------|-------|--------------|-------------|-----------------------------------|---------|-------------|-------------|-----------------------------------|---------|-------------|-------------|-----------------------------------|---------|
|                                |       | DM           | Non-DM      | Adjusted mean difference (95% CI) | P-value | DM          | Non-DM      | Adjusted mean difference (95% CI) | P-value | DM          | Non-DM      | Adjusted mean difference (95% CI) | P-value |
| BMI (kg/m <sup>2</sup> )       | 20-39 | 36.3 ± 9.0   | 27.8 ± 7.0  | 8.4 (8.2,8.5)                     | <0.001  | 30.6 ± 7.9  | 26.6 ± 6.2  | 4.1 (3.7,4.5)                     | <0.001  | 32.9 ± 9.5  | 28.0 ± 7.4  | 4.9 (4.1,5.8)                     | <0.001  |
|                                | 40-49 | 35.0 ± 8.0   | 28.1 ± 7.4  | 6.8 (6.7,6.9)                     | <0.001  | 29.5 ± 6.7  | 26.9 ± 5.7  | 2.6 (2.3,2.9)                     | <0.001  | 32.0 ± 7.2  | 28.6 ± 7.2  | 3.4 (2.9,3.8)                     | <0.001  |
|                                | 50-59 | 33.2 ± 8.1   | 27.8 ± 6.2  | 5.4 (5.3,5.5)                     | <0.001  | 28.6 ± 5.7  | 26.8 ± 5.5  | 1.8 (1.5,2.1)                     | <0.001  | 31.4 ± 7.3  | 28.7 ± 6.6  | 2.7 (2.3,3.2)                     | <0.001  |
|                                | 60-69 | 31.4 ± 6.4   | 27.3 ± 5.6  | 4.1 (4.0,4.2)                     | <0.001  | 27.5 ± 5.7  | 26.4 ± 6.4  | 1.1 (0.8,1.5)                     | <0.001  | 29.6 ± 6.0  | 28.2 ± 5.8  | 1.3 (0.8,1.8)                     | <0.001  |
|                                | 70-79 | 29.3 ± 6.5   | 26.3 ± 7.1  | 3.0 (2.9,3.1)                     | <0.001  | 26.9 ± 5.9  | 25.5 ± 5.3  | 1.3 (0.9,1.8)                     | <0.001  | 29.0 ± 6.2  | 27.4 ± 6.3  | 1.6 (1.0,2.3)                     | <0.001  |
|                                | ≥80   | 26.7 ± 6.2   | 24.8 ± 6.5  | 1.9 (1.8,2.0)                     | <0.001  | 25.3 ± 5.8  | 24.1 ± 6.0  | 1.2 (0.2,2.2)                     | 0.017   | 27.1 ± 6.3  | 25.7 ± 5.6  | 1.4 (0.2,2.6)                     | 0.025   |
| Weight (m)                     | 20-39 | 104.8 ± 26.6 | 80.4 ± 23.1 | 24.3 (23.8,24.9)                  | <0.001  | 85.8 ± 24.2 | 74.7 ± 19.9 | 11.1 (9.8,12.3)                   | <0.001  | 94.2 ± 25.6 | 80.0 ± 21.6 | 14.2 (11.9,16.4)                  | <0.001  |
|                                | 40-49 | 101.6 ± 23.7 | 81.8 ± 25.9 | 19.8 (19.4,20.2)                  | <0.001  | 81.8 ± 19.7 | 75.2 ± 17.3 | 6.6 (5.6,7.7)                     | <0.001  | 92.0 ± 21.0 | 82.1 ± 19.4 | 9.8 (8.5,11.1)                    | <0.001  |
|                                | 50-59 | 95.9 ± 22.8  | 80.3 ± 19.6 | 15.6 (15.4,15.9)                  | <0.001  | 78.4 ± 16.6 | 73.7 ± 16.6 | 4.8 (3.9,5.6)                     | <0.001  | 88.4 ± 19.9 | 81.5 ± 18.4 | 6.9 (5.6,8.2)                     | <0.001  |
|                                | 60-69 | 89.4 ± 19.8  | 77.8 ± 17.2 | 11.6 (11.4,11.8)                  | <0.001  | 74.4 ± 15.2 | 71.4 ± 18.0 | 2.9 (2.0,3.8)                     | <0.001  | 82.3 ± 16.4 | 78.5 ± 15.5 | 3.9 (2.5,5.2)                     | <0.001  |
|                                | 70-79 | 81.8 ± 19.3  | 73.5 ± 23.3 | 8.3 (8.1,8.6)                     | <0.001  | 71.7 ± 15.6 | 68.0 ± 14.6 | 3.8 (2.6,5.0)                     | <0.001  | 79.4 ± 15.2 | 75.1 ± 17.3 | 4.3 (2.6,6.1)                     | <0.001  |
|                                | ≥80   | 72.5 ± 16.5  | 67.1 ± 19.0 | 5.4 (5.2,5.7)                     | <0.001  | 66.3 ± 17.0 | 63.5 ± 16.1 | 2.9 (0.1,5.8)                     | <0.001  | 73.5 ± 16.8 | 70.4 ± 16.3 | 3.2 (0.2,6.5)                     | <0.001  |
| Systolic blood pressure (mmHg) | 20-39 | 132 ± 17     | 124 ± 17    | 9 (8,9)                           | <0.001  | 127 ± 17    | 121 ± 21    | 7 (5,8)                           | <0.001  | 130 ± 20    | 124 ± 19    | 7 (5,8)                           | <0.001  |
|                                | 40-49 | 136 ± 21     | 129 ± 22    | 7 (7,8)                           | <0.001  | 131 ± 20    | 126 ± 21    | 5 (4,6)                           | <0.001  | 134 ± 19    | 130 ± 22    | 4 (2,6)                           | <0.001  |
|                                | 50-59 | 139 ± 19     | 134 ± 19    | 5 (5,6)                           | <0.001  | 135 ± 23    | 131 ± 20    | 4 (3,5)                           | <0.001  | 138 ± 21    | 134 ± 22    | 5 (3,6)                           | <0.001  |
|                                | 60-69 | 141 ± 21     | 138 ± 24    | 3 (3,4)                           | <0.001  | 139 ± 19    | 136 ± 17    | 3 (2,4)                           | <0.001  | 143 ± 21    | 139 ± 21    | 5 (3,6)                           | <0.001  |
|                                | 70-79 | 142 ± 20     | 141 ± 20    | 1 (1,2)                           | <0.001  | 140 ± 21    | 138 ± 19    | 2 (1,3)                           | 0.025   | 143 ± 21    | 141 ± 22    | 2 (-1,4)                          | 0.056   |
|                                | ≥80   | 141 ± 22     | 141 ± 21    | -0.4 (-0.7,0.1)                   | 0.053   | 140 ± 22    | 139 ± 21    | 2 (-2,6)                          | 0.319   | 140 ± 22    | 143 ± 23    | -3 (-7,2)                         | 0.260   |
| Total cholesterol (mmol/l)     | 20-39 | 5.5 ± 1.6    | 5.7 ± 2.1   | -0.2 (-0.2,-0.1)                  | <0.001  | 5.3 ± 1.6   | 5.5 ± 1.5   | -0.2 (-0.3,-0.1)                  | 0.001   | 5.3 ± 1.8   | 5.6 ± 1.6   | -0.2 (-0.4,-0.1)                  | 0.024   |
|                                | 40-49 | 5.5 ± 1.5    | 5.6 ± 1.9   | -0.1 (-0.1,0)                     | <0.001  | 5.4 ± 1.3   | 5.5 ± 1.3   | -0.1 (-0.2,-0.1)                  | 0.002   | 5.3 ± 1.3   | 5.4 ± 1.3   | -0.1 (-0.2,-0.1)                  | 0.008   |
|                                | 50-59 | 5.4 ± 1.4    | 5.6 ± 1.5   | -0.2 (-0.2,-0.1)                  | <0.001  | 5.2 ± 1.5   | 5.4 ± 1.1   | -0.2 (-0.3,-0.1)                  | <0.001  | 5.3 ± 1.3   | 5.4 ± 1.4   | -0.1 (-0.2,-0.1)                  | 0.007   |
|                                | 60-69 | 5.2 ± 1.4    | 5.5 ± 1.4   | -0.3 (-0.3,-0.2)                  | <0.001  | 5.1 ± 1.3   | 5.2 ± 1.2   | -0.2 (-0.3,-0.1)                  | <0.001  | 5.2 ± 1.3   | 5.4 ± 1.2   | -0.3 (-0.4,-0.2)                  | <0.001  |
|                                | 70-79 | 5.0 ± 1.4    | 5.3 ± 1.3   | -0.3 (-0.3,-0.2)                  | <0.001  | 4.8 ± 1.4   | 5.0 ± 1.2   | -0.2 (-0.3,-0.1)                  | <0.001  | 5.0 ± 1.3   | 5.2 ± 1.3   | -0.1 (-0.3,0)                     | 0.037   |
|                                | ≥80   | 4.9 ± 1.5    | 5.2 ± 1.4   | -0.3 (-0.3,-0.2)                  | <0.001  | 4.8 ± 1.2   | 5.0 ± 1.3   | -0.2 (-0.4,0)                     | 0.057   | 4.8 ± 1.3   | 5.2 ± 1.4   | -0.4 (-0.6,-0.1)                  | 0.016   |
| HDL cholesterol                | 20-39 | 1.1 ± 0.4    | 1.4 ± 0.5   | -0.3 (-0.4,-0.3)                  | <0.001  | 1.1 ± 0.3   | 1.4 ± 0.4   | -0.3 (-0.4,-0.3)                  | <0.001  | 1.2 ± 0.4   | 1.4 ± 0.5   | -0.3 (-0.3,-0.2)                  | <0.001  |
|                                | 40-49 | 1.1 ± 0.4    | 1.4 ± 0.5   | -0.3 (-0.3,-0.2)                  | <0.001  | 1.1 ± 0.4   | 1.4 ± 0.6   | -0.3 (-0.3,-0.2)                  | <0.001  | 1.2 ± 0.4   | 1.4 ± 0.5   | -0.2 (-0.2,-0.1)                  | <0.001  |

|                                        |              |           |           |                  |        |           |           |                  |        |           |           |                  |        |
|----------------------------------------|--------------|-----------|-----------|------------------|--------|-----------|-----------|------------------|--------|-----------|-----------|------------------|--------|
| (mmol/l)                               | <b>50-59</b> | 1.2 ± 0.4 | 1.4 ± 0.5 | -0.3 (-0.3,-0.2) | <0.001 | 1.2 ± 0.3 | 1.4 ± 0.5 | -0.2 (-0.2,-0.1) | <0.001 | 1.3 ± 0.4 | 1.5 ± 0.5 | -0.2 (-0.2,-0.1) | <0.001 |
|                                        | <b>60-69</b> | 1.2 ± 0.4 | 1.5 ± 0.7 | -0.2 (-0.2,-0.1) | <0.001 | 1.2 ± 0.4 | 1.4 ± 0.5 | -0.2 (-0.2,-0.1) | <0.001 | 1.3 ± 0.4 | 1.5 ± 0.5 | -0.2 (-0.2,-0.1) | <0.001 |
|                                        | <b>70-79</b> | 1.3 ± 0.4 | 1.5 ± 0.9 | -0.2 (-0.2,-0.1) | <0.001 | 1.3 ± 0.4 | 1.5 ± 0.5 | -0.2 (-0.2,-0.1) | <0.001 | 1.4 ± 0.5 | 1.5 ± 0.5 | -0.1 (-0.2,0)    | 0.002  |
|                                        | <b>≥80</b>   | 1.4 ± 0.5 | 1.6 ± 0.6 | -0.2 (-0.2,-0.1) | <0.001 | 1.3 ± 0.4 | 1.5 ± 0.5 | -0.2 (-0.3,-0.1) | <0.001 | 1.4 ± 0.4 | 1.6 ± 0.5 | -0.1 (-0.2,-0.1) | 0.007  |
| <b>non-HDL cholesterol</b><br>(mmol/l) | <b>20-39</b> | 4.5 ± 1.8 | 4.3 ± 2.3 | 0.2 (0.1,0.2)    | <0.001 | 4.3 ± 1.6 | 4.1 ± 1.7 | 0.2 (0.1,0.3)    | 0.005  | 4.2 ± 1.7 | 4.1 ± 1.6 | 0.1 (-0.1,0.2)   | 0.633  |
|                                        | <b>40-49</b> | 4.4 ± 1.5 | 4.2 ± 1.9 | 0.2 (0.2,0.3)    | <0.001 | 4.2 ± 1.3 | 4.1 ± 1.2 | 0.2 (0.1,0.2)    | <0.001 | 4.1 ± 1.3 | 4.0 ± 1.5 | 0.1 (-0.1,0.2)   | 0.113  |
|                                        | <b>50-59</b> | 4.3 ± 1.4 | 4.2 ± 1.6 | 0.1 (0.1,0.2)    | <0.001 | 4.0 ± 1.4 | 4.0 ± 1.1 | 0 (-0.1,0.1)     | 0.473  | 4.0 ± 1.4 | 3.9 ± 1.3 | 0.1 (-0.1,0.1)   | 0.282  |
|                                        | <b>60-69</b> | 3.9 ± 1.4 | 4.0 ± 1.4 | -0.1 (-0.1,0)    | <0.001 | 3.8 ± 1.2 | 3.8 ± 1.2 | 0 (-0.1,0.1)     | 0.819  | 3.8 ± 1.3 | 3.9 ± 1.2 | -0.1 (-0.2,0.1)  | 0.068  |
|                                        | <b>70-79</b> | 3.7 ± 1.3 | 3.8 ± 1.2 | -0.1 (-0.1,0)    | <0.001 | 3.6 ± 1.4 | 3.6 ± 1.3 | 0 (-0.1,0.1)     | 0.991  | 3.6 ± 1.3 | 3.6 ± 1.2 | 0 (-0.2,0.1)     | 0.562  |
|                                        | <b>≥80</b>   | 3.6 ± 1.5 | 3.6 ± 1.3 | -0.1 (-0.1,0)    | <0.001 | 3.5 ± 1.1 | 3.4 ± 1.2 | 0 (-0.1,0.2)     | 0.930  | 3.4 ± 1.3 | 3.6 ± 1.4 | -0.2 (-0.5,0.1)  | 0.164  |
| <b>Triacylglycerol</b><br>(mmol/l)     | <b>20-39</b> | 3.2 ± 5.3 | 1.6 ± 2.9 | 1.6 (1.5,1.7)    | <0.001 | 2.8 ± 6.5 | 1.5 ± 1.0 | 1.3 (1.0,1.6)    | <0.001 | 2.1 ± 2.9 | 1.5 ± 2.1 | 0.6 (0.4,0.9)    | <0.001 |
|                                        | <b>40-49</b> | 3.0 ± 4.5 | 1.6 ± 2.3 | 1.4 (1.3,1.5)    | <0.001 | 2.4 ± 2.2 | 1.5 ± 1.3 | 0.9 (0.8,1.0)    | <0.001 | 1.9 ± 2.4 | 1.4 ± 1.3 | 0.5 (0.3,0.6)    | <0.001 |
|                                        | <b>50-59</b> | 2.6 ± 3.3 | 1.6 ± 1.9 | 1.0 (0.9,1.0)    | <0.001 | 2.2 ± 2.2 | 1.5 ± 1.1 | 0.6 (0.5,0.7)    | <0.001 | 1.7 ± 2.3 | 1.4 ± 1.3 | 0.3 (0.2,0.5)    | <0.001 |
|                                        | <b>60-69</b> | 2.2 ± 2.2 | 1.5 ± 1.5 | 0.7 (0.6,0.7)    | <0.001 | 2.0 ± 4.2 | 1.5 ± 2.2 | 0.5 (0.3,0.7)    | <0.001 | 1.6 ± 1.6 | 1.3 ± 1.8 | 0.2 (0.1,0.4)    | 0.026  |
|                                        | <b>70-79</b> | 1.9 ± 2.0 | 1.4 ± 1.3 | 0.5 (0.4,0.5)    | <0.001 | 1.9 ± 2.3 | 1.4 ± 1.0 | 0.5 (0.3,0.6)    | <0.001 | 1.4 ± 0.9 | 1.2 ± 1.3 | 0.1 (0,0.2)      | 0.046  |
|                                        | <b>≥80</b>   | 1.7 ± 1.5 | 1.3 ± 1.1 | 0.4 (0.3,0.4)    | <0.001 | 1.7 ± 1.2 | 1.3 ± 0.9 | 0.4 (0.3,0.6)    | <0.001 | 1.4 ± 1.4 | 1.2 ± 1.4 | 0.1 (-0.2,0.5)   | 0.363  |

Data are mean (95% CI) differences in risk factor levels between people T2DM and controls without diabetes, stratified by ethnic group (e.g. level in South Asians with T2DM minus level in South Asian controls). Differences are adjusted for between group differences in age, sex, general practice and deprivation

**ESM Table 9.** Adjusted mean (95%CI) differences in biological risk factor levels at age of diabetes onset between those newly diagnosed with type 2 diabetes compared with people without diabetes, by ethnicity and sex

| Biological risk factors        | Age   | White                             |                                   | South Asian                       |                                   | Black                             |                                   |
|--------------------------------|-------|-----------------------------------|-----------------------------------|-----------------------------------|-----------------------------------|-----------------------------------|-----------------------------------|
|                                |       | Women                             | Men                               | Women                             | Men                               | Women                             | Men                               |
|                                |       | Adjusted mean difference (95% CI) | Adjusted mean difference (95% CI) | Adjusted mean difference (95% CI) | Adjusted mean difference (95% CI) | Adjusted mean difference (95% CI) | Adjusted mean difference (95% CI) |
| BMI (kg/m <sup>2</sup> )       | 20-39 | 10.2 (9.9,10.4) *                 | 6.6 (6.3,6.8) *                   | 5.3 (4.7,6.0) *                   | 2.8 (2.3,3.4) *                   | 5.9 (5.0,6.9) *                   | 4.0 (2.8,5.2) *                   |
|                                | 40-49 | 8.9 (8.8,9.1) *                   | 5.4 (5.2,5.5) *                   | 4.0 (3.5,4.6) *                   | 1.5 (1.1,2.0) *                   | 4.3 (3.6,5.0) *                   | 2.7 (2.1,3.3) *                   |
|                                | 50-59 | 6.8 (6.7,6.9) *                   | 4.5 (4.4,4.6) *                   | 2.4 (2.0,2.9) *                   | 1.3 (0.9,1.7) *                   | 3.1 (2.4,3.8) *                   | 2.1 (1.5,2.7) *                   |
|                                | 60-69 | 4.9 (4.8,5.0) *                   | 3.5 (3.4,3.6) *                   | 1.1 (0.6,1.7) *                   | 1.1 (0.7,1.6) *                   | 1.4 (0.6,2.1) *                   | 1.3 (0.7,2.0) *                   |
|                                | 70-79 | 3.5 (3.4,3.6) *                   | 2.4 (2.3,2.5) *                   | 1.5 (0.8,2.2) *                   | 1.2 (0.7,1.7) *                   | 1.5 (0.6,2.4) *                   | 1.7 (0.8,2.5) *                   |
|                                | ≥80   | 2.0 (1.9,2.1) *                   | 1.7 (1.6,1.9) *                   | 1.0 (-0.1,2.2)                    | 1.4 (-0.1,2.8)                    | 1.8 (0.1,3.5) *                   | 0.9 (-0.7,2.6)                    |
| Weight (m)                     | 20-39 | 27.6 (26.9,28.3) *                | 20.2 (19.5,20.9) *                | 13.1 (11.4,14.7) *                | 7.6 (5.7,9.4) *                   | 16.6 (14.2,19.0) *                | 11.1 (7.6,14.7) *                 |
|                                | 40-49 | 27.8 (23.3,24.2) *                | 16.6 (16.0,17.1) *                | 9.9 (8.6,11.3) *                  | 3.3 (1.9,4.7) *                   | 11.8 (10.0,13.6) *                | 7.8 (6.2,9.4) *                   |
|                                | 50-59 | 17.7 (17.4,18.1) *                | 13.7 (13.4,14.0) *                | 6.7 (5.7,7.8) *                   | 3.2 (2.0,4.3) *                   | 8.3 (6.5,10.1) *                  | 6.2 (4.4,8.0) *                   |
|                                | 60-69 | 12.7 (12.4,13.0) *                | 10.3 (10.1,10.6) *                | 3.6 (2.5,4.8) *                   | 2.9 (1.6,4.2) *                   | 4.3 (2.3,6.3) *                   | 3.3 (1.3,5.3) *                   |
|                                | 70-79 | 9.0 (8.7,9.3) *                   | 7.2 (6.8,7.6) *                   | 4.6 (2.9,6.3) *                   | 3.1 (1.5,4.8) *                   | 4.4 (2.1,6.8) *                   | 4.7 (2.3,7.1) *                   |
|                                | ≥80   | 5.4 (5.1,5.7) *                   | 5.1 (4.7,5.4) *                   | 2.6 (-0.1,6.0)                    | 3.8 (-0.4,7.9)                    | 5.4 (0.8,10.0) *                  | 1.3 (-3.1,5.7)                    |
| Systolic blood pressure (mmHg) | 20-39 | 9.7 (9.0,10.3) *                  | 7.6 (6.9,8.3) *                   | 7.6 (5.7,9.5) *                   | 5.2 (3.7,6.7) *                   | 6.8 (4.0,9.6) *                   | 6.1 (3.6,8.6) *                   |
|                                | 40-49 | 8.9 (8.4,9.4) *                   | 6.0 (5.6,6.4) *                   | 6.9 (5.0,8.8) *                   | 3.0 (1.8,4.3) *                   | 4.1 (1.9,6.4) *                   | 3.7 (0.8,6.5) *                   |
|                                | 50-59 | 6.8 (6.4,7.2) *                   | 4.4 (4.1,4.7) *                   | 5.0 (3.6,6.4) *                   | 3.2 (1.6,4.8) *                   | 4.9 (3.0,6.7) *                   | 4.5 (2.5,6.5) *                   |
|                                | 60-69 | 4.1 (3.8,4.5) *                   | 2.6 (2.0,3.3) *                   | 3.7 (2.1,5.2) *                   | 2.1 (0.5,3.6) *                   | 5.2 (3.0,7.4) *                   | 3.6 (1.2,5.9) *                   |
|                                | 70-79 | 1.3 (1.0,1.6) *                   | 1.2 (0.8,1.5) *                   | 2.4 (0.1,4.7) *                   | 1.4 (-0.9,3.6)                    | 0.9 (-2.3,4.1)                    | 3.5 (0.4,6.7) *                   |
|                                | ≥80   | -0.2 (-0.7,0.2)                   | -0.5 (-1.0,0.1)                   | 2.5 (-2.1,7.2)                    | 1.0 (-5.0,7.0)                    | -2.6 (-8.9,3.6)                   | -2.5 (-8.7,3.8)                   |
| Total cholesterol (mmol/l)     | 20-39 | -0.4 (-0.4,-0.3) *                | 0.1 (-0.1,0.1)                    | -0.4 (-0.5,-0.3) *                | -0.1 (-0.1,0.1)                   | -0.4 (-0.6,-0.2) *                | -0.1 (-0.4,0.2)                   |
|                                | 40-49 | -0.2 (-0.3,-0.2) *                | 0.1 (0.1,0.2) *                   | -0.2 (-0.3,-0.1) *                | -0.1 (-0.1,0.1)                   | -0.2 (-0.4,-0.1) *                | -0.1 (-0.1,0.1)                   |
|                                | 50-59 | -0.2 (-0.2,-0.1) *                | -0.1 (-0.2,-0.1) *                | -0.2 (-0.3,-0.1) *                | -0.2 (-0.3,-0.1) *                | -0.1 (-0.3,0.1)                   | -0.2 (-0.3,-0.1) *                |
|                                | 60-69 | -0.3 (-0.3,-0.2) *                | -0.3 (-0.3,-0.2) *                | -0.2 (-0.3,-0.1) *                | -0.2 (-0.3,-0.1) *                | -0.3 (-0.4,-0.1) *                | -0.2 (-0.4,-0.1) *                |
|                                | 70-79 | -0.3 (-0.4,-0.3) *                | -0.3 (-0.3,-0.2) *                | -0.2 (-0.3,0.1)                   | -0.3 (-0.4,-0.1) *                | -0.2 (-0.4,-0.1) *                | -0.1 (-0.3,0.1)                   |
|                                | ≥80   | -0.3 (-0.3,-0.2) *                | -0.3 (-0.3,-0.2) *                | -0.3 (-0.5,0.1)                   | -0.2 (-0.5,0.2)                   | -0.5 (-1.0,-0.1) *                | -0.2 (-0.6,0.2)                   |
|                                | 20-39 | -0.4 (-0.4,-0.3) *                | -0.2 (-0.3,-0.2) *                | -0.4 (-0.4,-0.3) *                | -0.2 (-0.3,-0.2) *                | -0.3 (-0.4,-0.2) *                | -0.2 (-0.3,-0.1) *                |

|                                    |                                        |                    |                    |                    |                    |                    |                    |
|------------------------------------|----------------------------------------|--------------------|--------------------|--------------------|--------------------|--------------------|--------------------|
| <b>HDL cholesterol</b><br>(mmol/l) | <b>40-49</b>                           | -0.4 (-0.4,-0.3) * | -0.2 (-0.2,-0.1) * | -0.3 (-0.4,-0.3) * | -0.2 (-0.2,-0.1) * | -0.2 (-0.3,-0.2) * | -0.1 (-0.2,-0.1) * |
|                                    | <b>50-59</b>                           | -0.3 (-0.4,-0.3) * | -0.2 (-0.2,0.1) *  | -0.3 (-0.3,-0.2) * | -0.2 (-0.2,-0.1) * | -0.3 (-0.3,-0.2) * | -0.1 (-0.2,-0.1) * |
|                                    | <b>60-69</b>                           | -0.3 (-0.3,-0.2) * | -0.2 (-0.2,-0.1) * | -0.2 (-0.3,-0.2) * | -0.2 (-0.2,-0.1) * | -0.2 (-0.3,-0.1) * | -0.1 (-0.2,-0.1) * |
|                                    | <b>70-79</b>                           | -0.3 (-0.3,-0.2) * | -0.2 (-0.2,-0.1) * | -0.2 (-0.3,-0.2) * | -0.2 (-0.2,-0.1) * | -0.1 (-0.2,-0.1) * | -0.1 (-0.1,0.1)    |
|                                    | <b>≥80</b>                             | -0.2 (-0.3,-0.2) * | -0.2 (-0.2,-0.1) * | -0.2 (-0.3,-0.1) * | -0.2 (-0.3,-0.1) * | -0.2 (-0.3,0.1)    | -0.1 (-0.3,0.1)    |
|                                    | <b>non-HDL cholesterol</b><br>(mmol/l) | <b>20-39</b>       | 0.1 (0.0,0.1)      | 0.3 (0.2,0.4) *    | 0.1 (-0.1,0.2)     | 0.3 (0.1,0.4) *    | -0.1 (-0.2,0.1)    |
| <b>40-49</b>                       |                                        | 0.2 (0.1,0.2) *    | 0.3 (0.2,0.3) *    | 0.1 (0.1,0.2) *    | 0.2 (0.1,0.2) *    | 0.1 (-0.1,0.2)     | 0.1 (0.0,0.2)      |
| <b>50-59</b>                       |                                        | 0.1 (0.1,0.2) *    | 0.1 (0.1,0.2) *    | 0.1 (-0.1,0.2)     | -0.1 (-0.1,0.0)    | 0.1 (-0.1,0.3)     | -0.1 (-0.2,0.1)    |
| <b>60-69</b>                       |                                        | -0.1 (-0.1,0.1)    | -0.1 (-0.2,-0.1) * | 0.1 (-0.1,0.1)     | -0.1 (-0.2,0.1)    | -0.1 (-0.2,0.1)    | -0.1 (-0.3,0.1)    |
| <b>70-79</b>                       |                                        | -0.1 (-0.2,-0.1) * | -0.1 (-0.2,-0.1) * | 0.1 (-0.1,0.2)     | -0.1 (-0.2,0.1)    | -0.1 (-0.2,0.1)    | -0.1 (-0.3,0.1)    |
| <b>≥80</b>                         |                                        | -0.1 (-0.2,-0.1) * | -0.1 (-0.2,-0.1) * | -0.1 (-0.3,0.2)    | 0.1 (-0.3,0.4)     | -0.4 (-0.8,0.1)    | -0.1 (-0.5,0.4)    |
| <b>Triacylglycerol</b><br>(mmol/l) | <b>20-39</b>                           | 1.1 (1.0,1.3) *    | 2.0 (1.9,2.1) *    | 0.9 (0.4,1.3) *    | 1.5 (1.1,1.9) *    | 0.4 (0.2,0.6) *    | 0.8 (0.5,1.2) *    |
|                                    | <b>40-49</b>                           | 1.1 (1.0,1.1) *    | 1.6 (1.5,1.7) *    | 0.7 (0.6,0.8) *    | 0.9 (0.8,1.1) *    | 0.4 (0.2,0.6) *    | 0.5 (0.4,0.6) *    |
|                                    | <b>50-59</b>                           | 0.9 (0.9,1.0) *    | 1.1 (1.0,1.1) *    | 0.6 (0.5,0.7) *    | 0.7 (0.5,0.8) *    | 0.4 (0.2,0.6) *    | 0.3 (0.1,0.5) *    |
|                                    | <b>60-69</b>                           | 0.7 (0.6,0.7) *    | 0.7 (0.6,0.7) *    | 0.6 (0.3,0.9) *    | 0.3 (0.1,0.5) *    | 0.2 (-0.1,0.3)     | 0.3 (0.1,0.6) *    |
|                                    | <b>70-79</b>                           | 0.5 (0.5,0.6) *    | 0.5 (0.4,0.5) *    | 0.6 (0.4,0.8) *    | 0.4 (0.2,0.6) *    | 0.1 (-0.1,0.2)     | 0.1 (-0.1,0.3)     |
|                                    | <b>≥80</b>                             | 0.4 (0.3,0.4) *    | 0.4 (0.3,0.4) *    | 0.4 (0.2,0.6) *    | 0.5 (0.3,0.7) *    | 0.1 (-0.5,0.8)     | 0.2 (-0.1,0.4)     |

\* indicates p<0.05

Data are mean (95% CI) differences in risk factor levels between people T2DM and controls without diabetes, stratified by ethnic group and sex (e.g. level in White women with T2DM minus level in White women controls). Differences are adjusted for between group differences in age, sex, general practice and deprivation.

ESM Fig 1. Combining ethnicity records from CPRD and hospital records (HES)

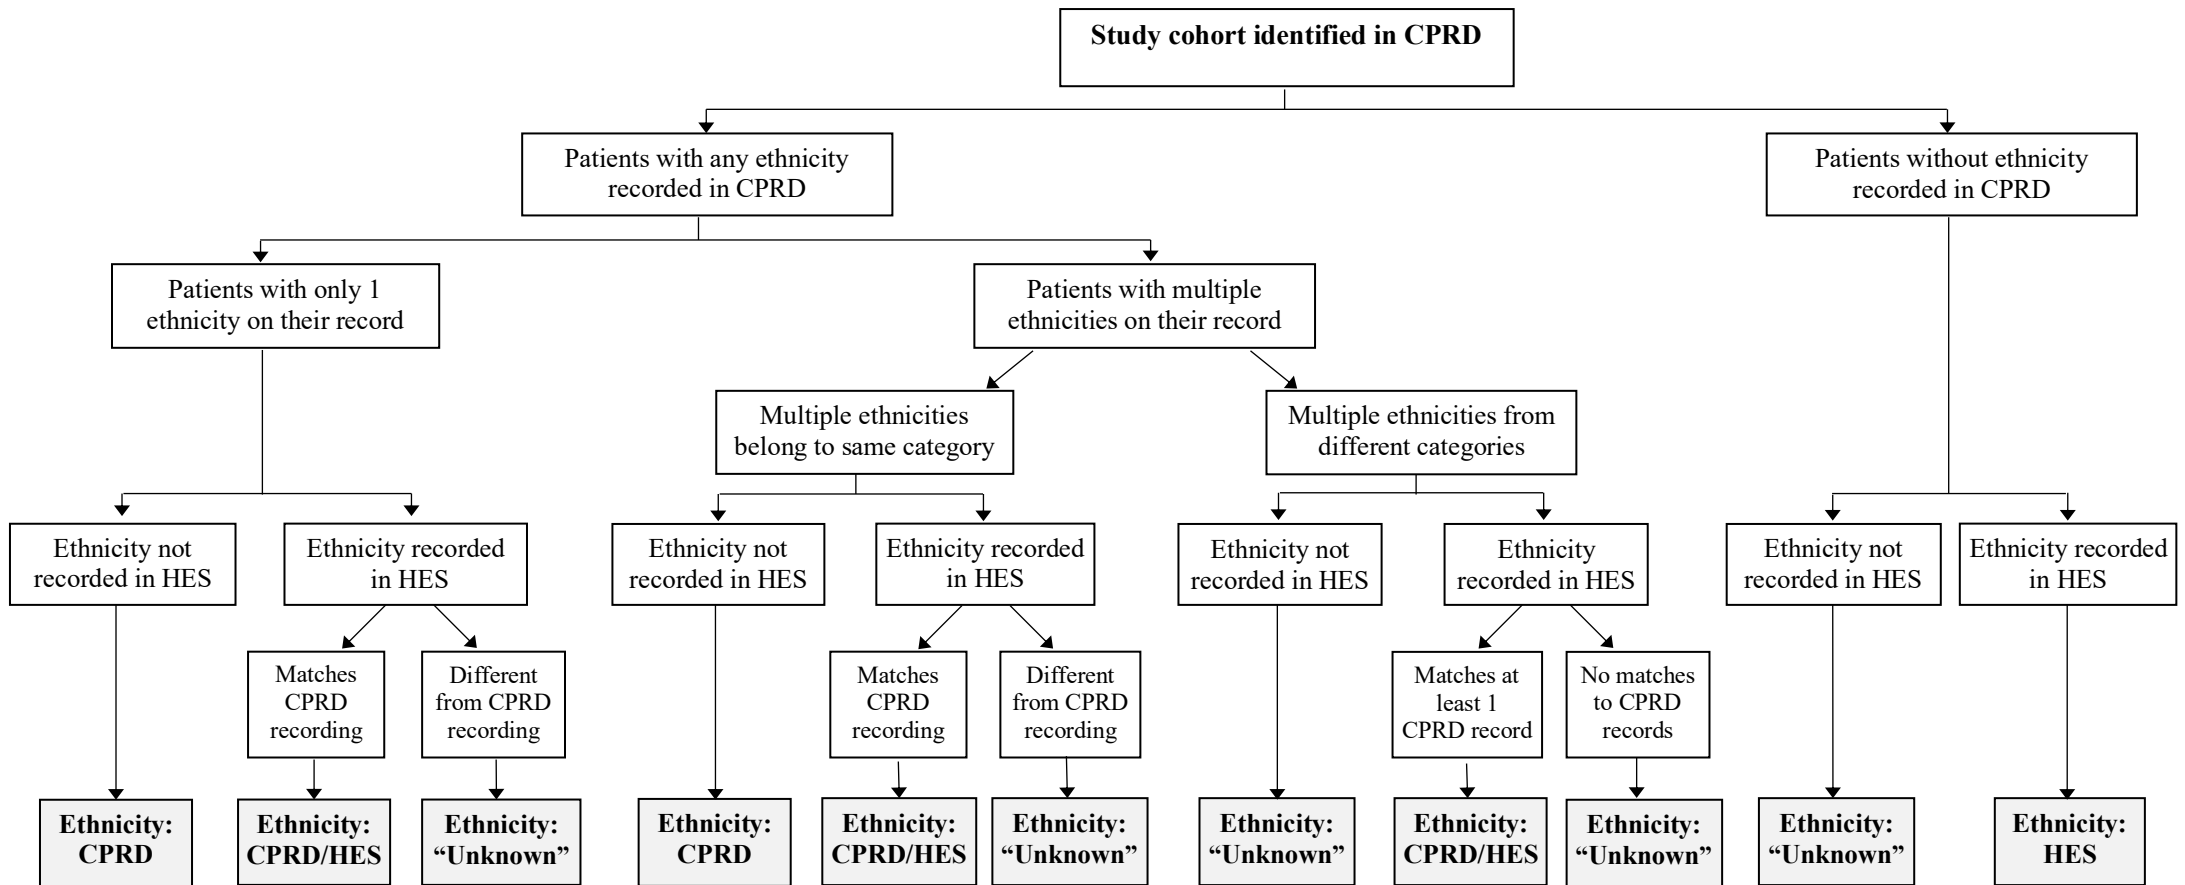

Supplement: MOESM1 [file 18002898]
